# Supplementary material
Source: PubMed Central journal article supplement (PMC3462662)
Supplement: NIHMS103021-supplement-1.pdf [file NIHMS103021-supplement-1.pdf]

## Supplementary Figure 1

22,632 dsRNAs (~250ng) arrayed in sixty-two 384-well plates in duplicate scored for E protein expression

Filter for dsRNAs affecting final cell number

20,224 dsRNAs analyzed

Sum Rank of duplicate dsRNAs

218 candidate dsRNAs targeting DVHFs

Re-synthesis of dsRNAs for re-screening

179 candidate dsRNAs targeting DVHFs

Re-screen of dsRNAs (>1.5 fold inhibition;  $p < 0.05$ )

118 dsRNAs identifying 116 DVHFs

**Supplementary Figure 1.** Outline of experimental steps taken to identify DVHFs indicating the number of dsRNAs passing through each filter. Prior to duplicate plate comparison, each dsRNA was assayed for its effect on cell proliferation. Wells with less than 12,500 cells in either duplicate were shown to provide unreliable data and removed from further consideration. The remaining wells were then compared to their duplicates for reproducibility and ranked against the rest of the wells on the plate. Only those dsRNAs duplicates with expectation  $\leq 0.065$  (218) were considered candidates for further investigation. 179 of the 218 candidates were re-synthesized and tested again for reproducibility of the initial observation with the additional criteria that infectivity had to be inhibited by  $\geq 1.5$  fold with a p-value  $< 0.05$ . 118 dsRNAs passed these benchmarks identifying 116 unique DVHFs.

# Supplementary Figure 2

**a**

|       | <u>Nucleotide</u> | <u>Amino Acid</u> |
|-------|-------------------|-------------------|
| 5'UTR | 1                 | N/A               |
| C     | 1                 | 1                 |
| prM   | 0                 | 0                 |
| E     | 8                 | 6                 |
| NS1   | 2                 | 2                 |
| NS2a  | 1                 | 1                 |
| NS2b  | 1                 | 0                 |
| NS3   | 4                 | 2                 |
| NS4a  | 4                 | 0                 |
| NS4b  | 0                 | 0                 |
| NS5   | 9                 | 4                 |
| 3'UTR | 1                 | N/A               |

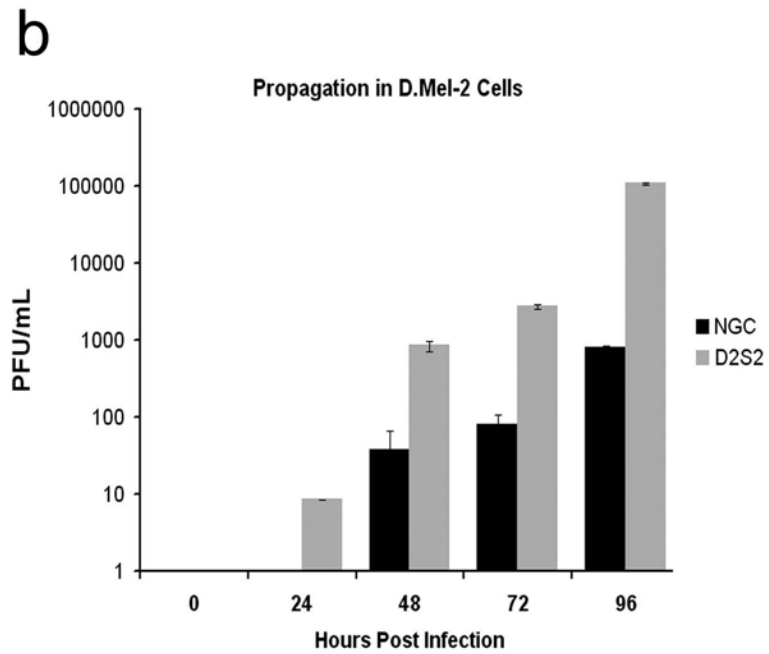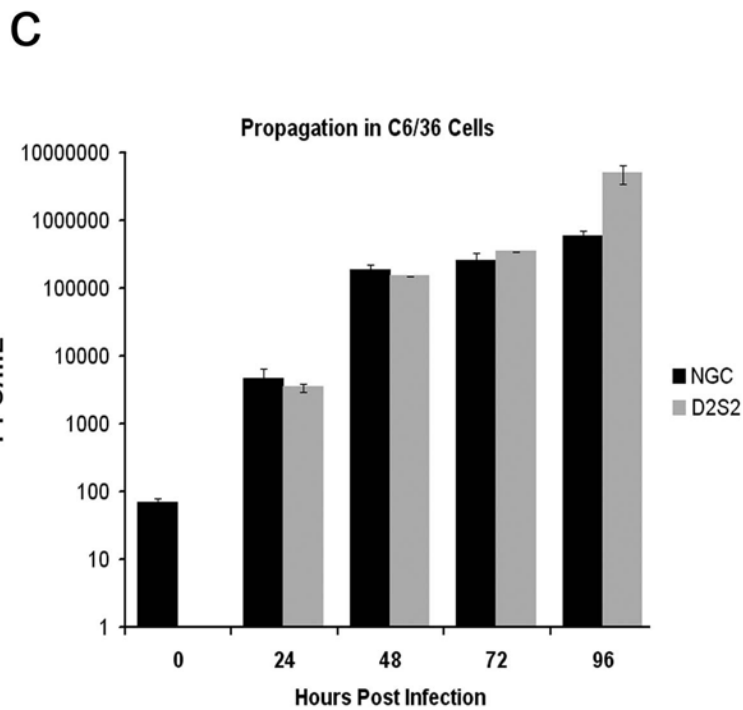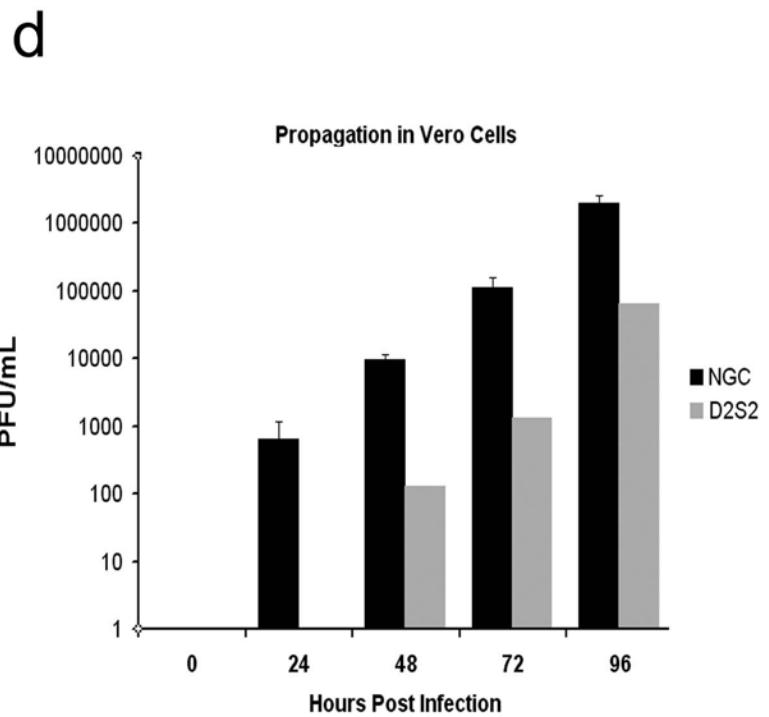

**Supplementary Figure 2.** Summary of DEN2-S2 mutations and viral propagation curves in *Drosophila*, mosquito and mammalian cell lines. (A) Summary of mutations observed in DEN2-S2 at the nucleotide and amino acid levels compared to the parental DEN2-NGC strain. DEN2-NGC and its D.Mel-2 adapted derivation, DEN2-S2 were tested for their ability to propagate over 96hrs in *Drosophila* D.Mel-2 cells (B), mosquito C6/36 cells (C), and mammalian Vero cells (D) were infected at a MOI of 1 with DEN2-NGC and DEN2-S2. After one hour adsorption at 28 °C (D.Mel-2 and C6/36 cells) or 37 °C (Vero), inoculation was removed, cells were washed once with PBS and growth media was added. Supernatants were collected every 24 hours, serially diluted and added to Vero monolayers for one hour at 37°C followed by addition of a 1:1 tragacanth gum/2x EMEM overlay supplemented with 2% FBS. Cultures were allowed to incubate for 4-5 days at which point they were fixed, permeabilized, stained for DEN E-protein expression. Foci were then counted and averaged. Error bars represent the standard deviation of three independent samples.

# Supplementary Figure 3

a

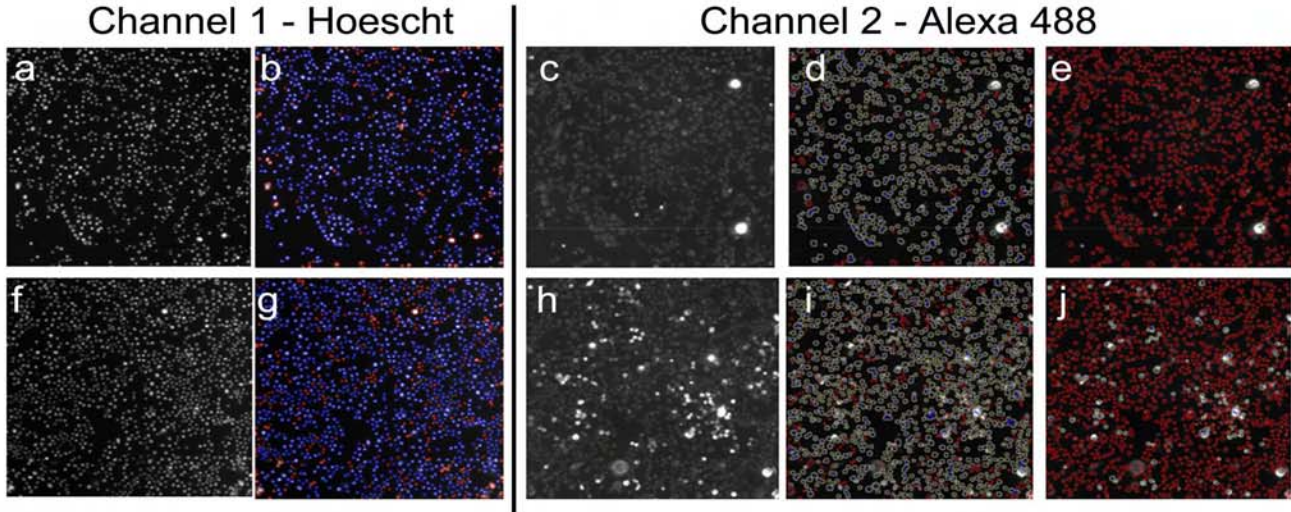

b

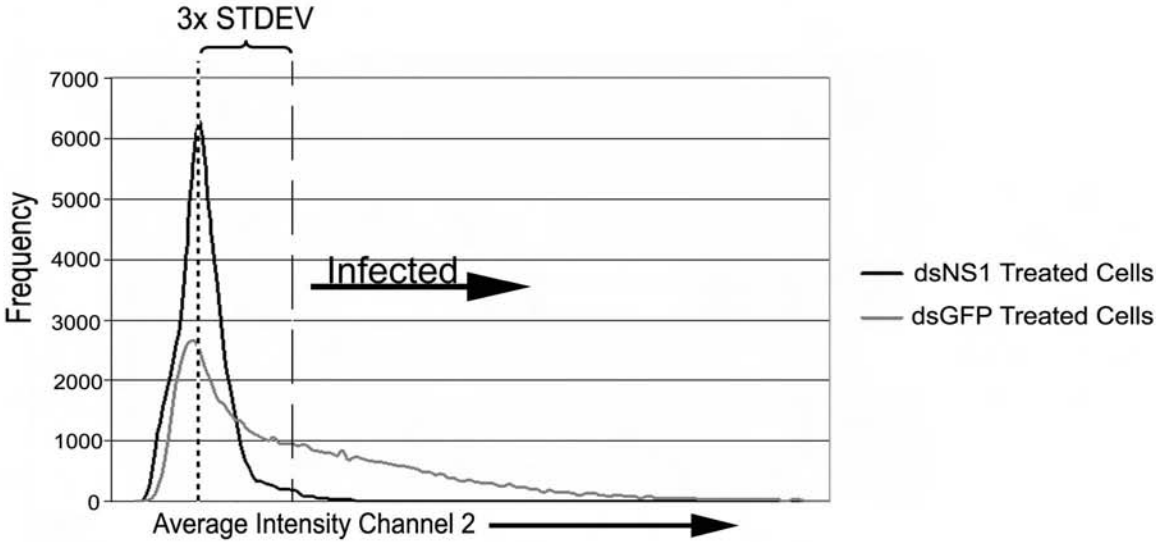

**Supplementary Figure 3.** Automated determination of DEN2-S2 infectivity. dsRNA treated cells exposed to DEN2-S2 for 72 hours were immunofluorescently labeled and imaged at 20x magnification with a Cellomics ArrayScan. Images were then analyzed with the Cellomics Target Activation software to identify infected cells. Panel A: Images of dsNS1 treated cells (a-e) and dsGFP treated cells (f-j) were taken in two channels: Hoescht 33342 (a, b, f, g) and Alexa-488 (c-e, h-j). Nuclear identification parameters were applied to the raw Hoescht 33342 images (a, f). Nuclei that passed these criteria are marked by a blue boundary and those that failed are marked in red (b, g). The blue boundaries around selected nuclei from the Hoescht 33342 channel were then superimposed onto the raw Alexa-488 images (c, h). A second boundary, extending 2 pixels in all directions beyond the inner blue boundary was applied to each selected object (yellow) (selected object = cells) (d, i) and the mean average intensity was calculated for each selected object. A minimum average intensity in the Alexa-488 channel was then calculated (see Panel B) and applied to each selected object. The selected objects that were above this threshold remain yellow while those that were below become red (e, j). Panel B: A frequency distribution for the average intensities of each object was generated for D.Mel-2 cells treated with either dsNS1 or dsGFP were plotted on a histogram. The mean average intensity from four cultures treated with dsNS1 RNA was calculated and the threshold for determining whether a cell was infected was then defined as being  $\geq 3$  standard deviations away from this average.

# Supplementary Figure 4

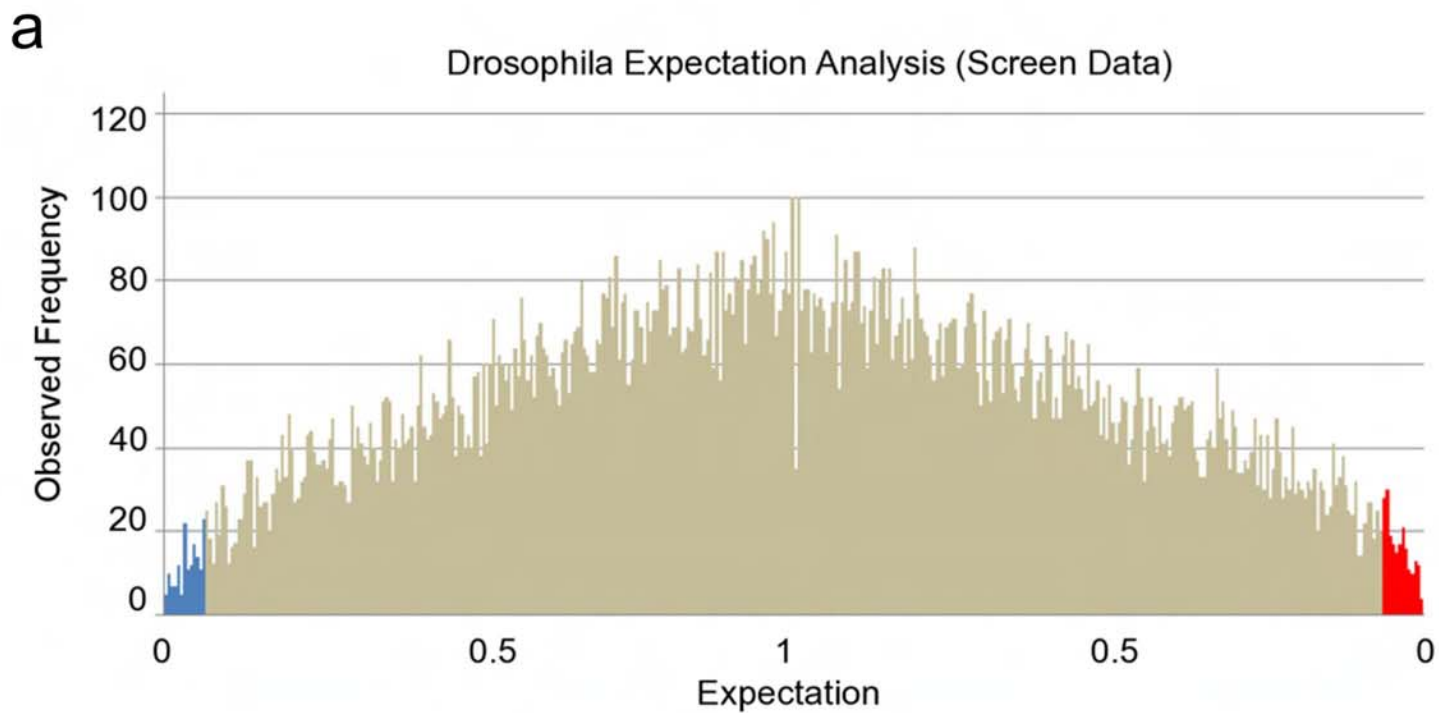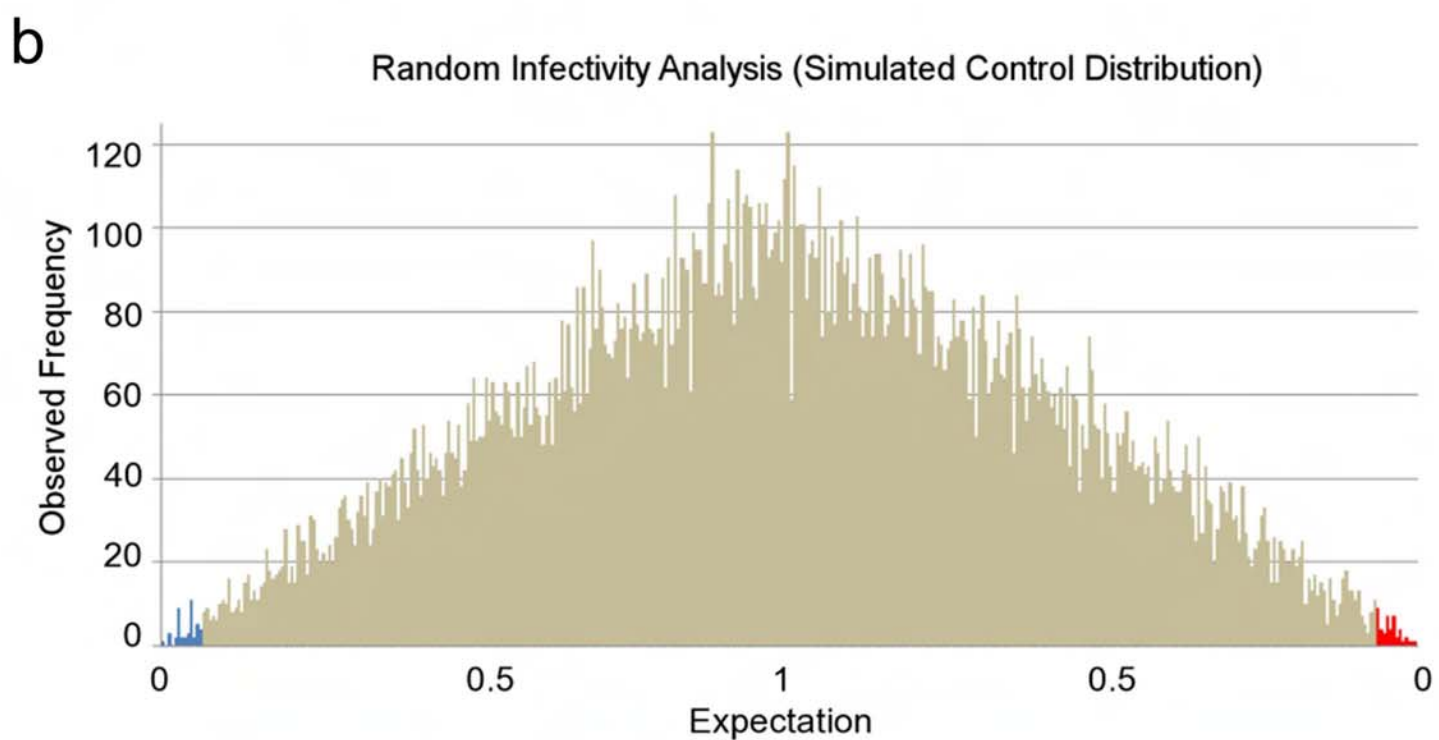

**Supplementary Figure 4.** Histogram of observed and theoretical distributions of expected Sum Rank values. For each paired well in the screen, a Sum Rank statistic was calculated. The expected frequency of each observed Sum Rank is shown on the horizontal axis, with uncommon extremes in low infectivity to the left and high infectivity to the right. The vertical axis indicates the frequency with which each expectation value was observed during the screen in D.Mel-2 cells (A) and in a computational simulation of random infectivity (B). Sum Ranks expected to occur fewer than 0.065 times per paired duplicate plate are highlighted in blue and red, representing extremes of low and high infectivity, respectively. Wells from the *Drosophila* screen (A) yielded a significantly larger number of wells with extremes of low ( $\chi^2 = 62.8$ ,  $p < 0.0001$ ) and high ( $\chi^2 = 108$ ,  $p < 0.0001$ ) infectivity compared to that expected by wells assigned random infectivity (B), suggesting detectable departures from random biological variation upon treatment of cells with dsRNAs. Using the random infectivity analysis to determine the false discovery rate suggested that roughly 24% of detected “hits” (expectation less than 0.065) were due to random chance alone, in rough agreement with the validation rate of putative hits.



## Supplementary Figure 5

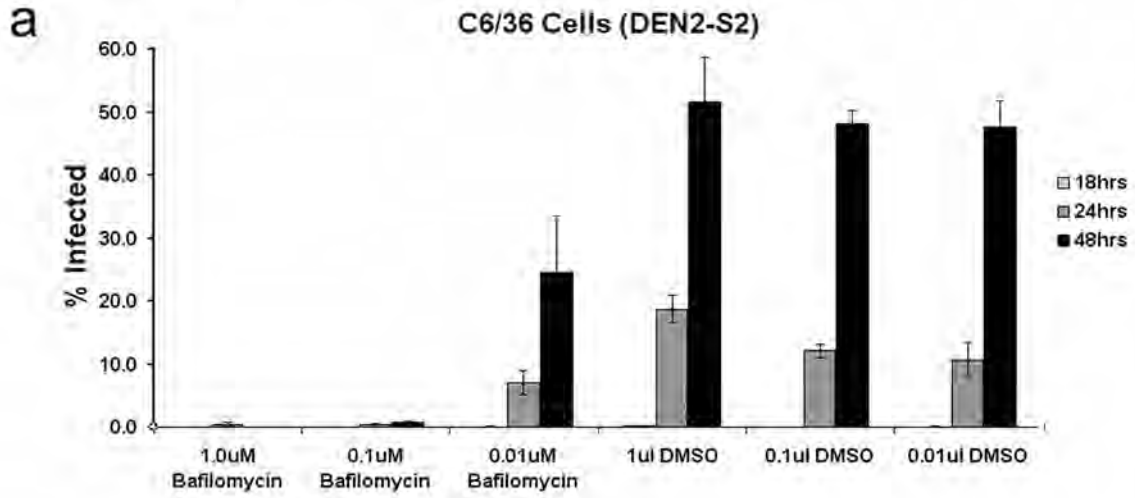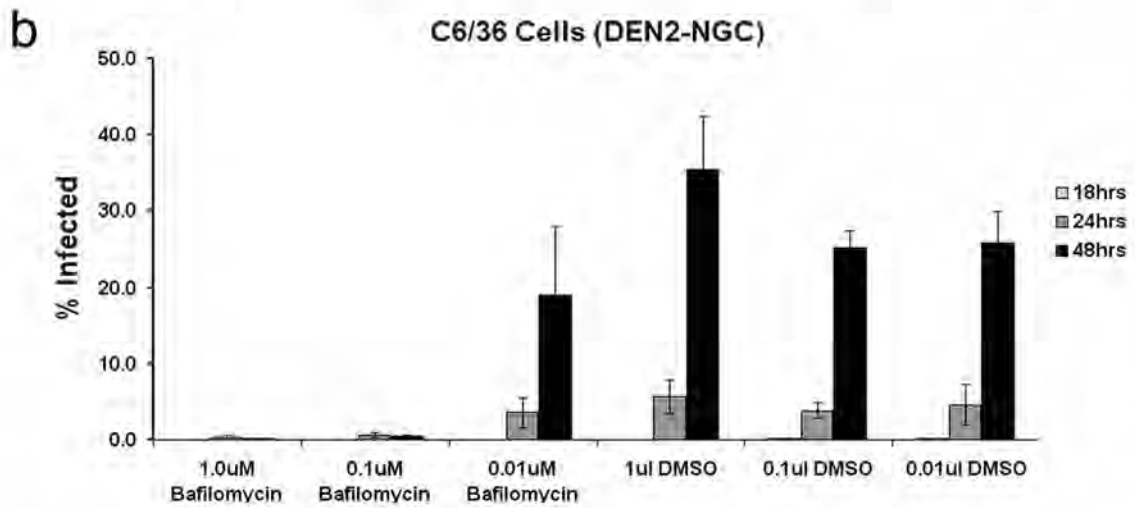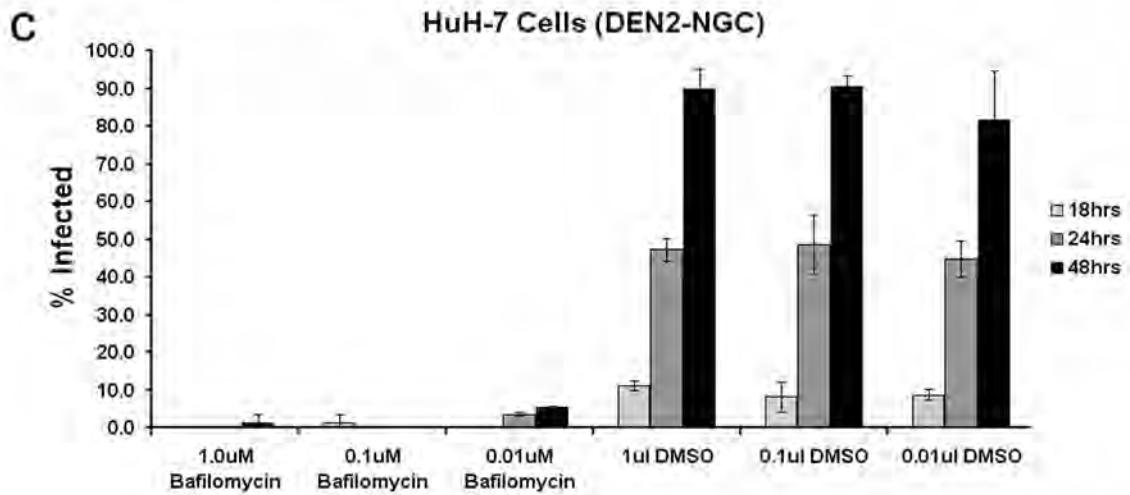

**Supplementary Figure 5.** The V-ATPase holoenzyme, a DVHF in dipteran and human cells. Serial dilutions of the specific V-ATPase inhibitor, bafilomycin A1, were tested for their efficacy to reduce viral gene expression in mosquito C6/36 (a & b) and human HuH-7 (c) cell lines. DMSO without bafilomycin A1 serves as a vehicle control. Error bars represent standard deviation of three independent observations.

## Supplementary Figure 6

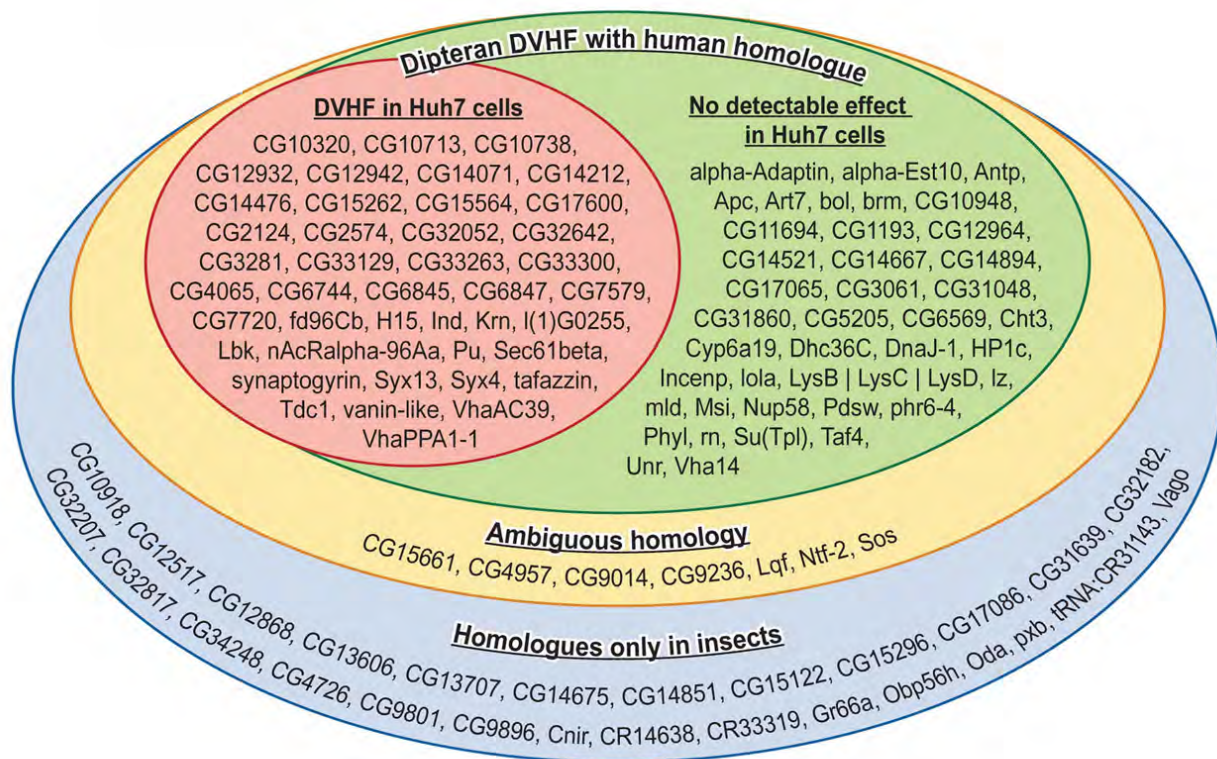

**Supplementary Figure 6.** Human and dipteran DVHFs. The 116 unique dipteran DVHFs include 27 gene products with homologues found exclusively among insects. The majority of the 116 had readily identifiable human homologues and these are divided here depending on the results of the human screen.

## Supplementary Discussion

**Candidate DENV restriction factors (DHRFs).** The initial screen also detected 296 dsRNAs that significantly enhanced infectivity (Supplementary Figure 4). Whereas these dsRNAs could identify interesting gene products that restrict DENV propagation, we chose not to analyze these further at this time and focus here on the DVHFs described in the text.

**Conservation between invertebrate and vertebrate hosts.** Sixteen dipteran DVHFs had annotated homologues only among *Drosophila* species and another eleven only among insects (Supplementary Figure 5). These 27 are enriched in genes associated with sensation and response to chemicals, and the transport of ions (FlyMine v12.0) and several belong to families of poorly conserved genes (e.g., gustatory receptors). The DVHFs conserved in dipterans and humans were significantly enriched for genes associated with secretion, membrane docking and vesicle transport. This may not be surprising since delivery of DENV genomes to the cytoplasm and assembly of virions in the ER of both insect and human cells is likely to require these basic processes. One of the more intriguing discoveries was the conserved requirement for DC-STAMP (TM7SF4), which we propose as a candidate for a DENV receptor.

**Comparison with other genome-wide screens.** We compared the results of our D.Mel-2 screen with previously published dsRNA screens and found significant overlap with two other screens that identified gene products required for MAPK signaling<sup>1</sup> and Ca<sup>2+</sup> influx<sup>2</sup>. Pathways that mediated Ca<sup>2+</sup> influx are consistent with the proposed role of Rab5 in viral entry<sup>3</sup>. The only DVHFs identified in a recent screen for factors affecting influenza infection in drosophila cells were *lola*, *Sec61β* and a V-ATPase subunit<sup>4</sup>. See

below for a discussion of the results of a screen for host factors important for *Drosophila* C Virus <sup>5</sup>. If we extended the analysis to drosophila homologues of factors identified in human cells the overlap was still not extensive. The Sec61, the mitochondrial Complex I and V-ATPase subunits, which were identified here as DVHFs, have been previously recognized as HIV dependency factors <sup>6</sup>. When we examined a list of hepatitis C virus factors identified in a targeted siRNA screen <sup>7</sup>, we did not find any homologues among our dipteran DVHFs. Surprisingly, comparison of the DVHFs identified in our study with the list of host factors found to affect West Nile virus in a recent study <sup>8</sup> revealed that only Sec61 and V-ATPase were shared between the two studies. These authors identified a longer list of WNV host factors that also affected DENV, suggesting that host factor dependence could vary depending on the experimental details (e.g., cell types and viral construct or strain). It should be pointed out that our screen was carried out with an infectious DENV2.

**Ribosomal Components.** Surprisingly absent among DVHFs were ribosomal proteins, which were the majority of the hits from a genome-wide screen for factors required for efficient *Drosophila* C Virus propagation <sup>5</sup>. Their absence among DVHFs could be due to an effect on cell number: 65 of the 131 dsRNAs targeting these proteins were removed from analysis due to low cell density. This represented a significant over-representation of dsRNAs targeting ribosomal proteins among those that affected cell density (49.6% for ribosomal proteins vs. 10.3% overall;  $\chi^2 = 213.0$ ,  $p = 3 \times 10^{-48}$ ).

#### **References for the supplementary discussion.**

- <sup>1</sup> Friedman, A. and Perrimon, N., A functional RNAi screen for regulators of receptor tyrosine kinase and ERK signalling. *Nature* **444** (7116), 230 (2006).
- <sup>2</sup> Vig, M. et al., CRACM1 is a plasma membrane protein essential for store-operated Ca<sup>2+</sup> entry. *Science* **312** (5777), 1220 (2006).

- 3 Krishnan, M. N. et al., Rab 5 is required for the cellular entry of dengue and West  
Nile viruses. *J Virol* **81** (9), 4881 (2007).
- 4 Hao, L. et al., Drosophila RNAi screen identifies host genes important for  
influenza virus replication. *Nature* **454** (7206), 890 (2008).
- 5 Cherry, S. et al., Genome-wide RNAi screen reveals a specific sensitivity of  
IRES-containing RNA viruses to host translation inhibition. *Genes Dev* **19** (4),  
445 (2005).
- 6 Brass, A. L. et al., Identification of host proteins required for HIV infection  
through a functional genomic screen. *Science* **319** (5865), 921 (2008); Zhou, H. et  
al., Genome-Scale RNAi Screen for Host Factors Required for HIV Replication.  
*Cell Host Microbe* (2008).
- 7 Randall, G. et al., Cellular cofactors affecting hepatitis C virus infection and  
replication. *Proc Natl Acad Sci U S A* **104** (31), 12884 (2007).
- 8 Krishnan, M. N. et al., RNA interference screen for human genes associated with  
West Nile virus infection. *Nature* **455** (7210), 242 (2008).

## **Methods**

### ***Cell Culture***

*Aedes albopictus* C6/36 cells (ATCC# CRL-1660) and D. Mel-2 (Invitrogen Cat#10831014) were cultured at 28°C, 5% CO<sub>2</sub>. C6/36 cells were grown in MEM (Sigma) supplemented with antibiotic, non-essential amino acids, sodium pyruvate, 5mM HEPES and 10% FBS (Hyclone). D.Mel-2 cells were grown in SF900 II SFM (Gibco) supplemented with antibiotic. Human hepatoma HuH-7 cells and African green monkey kidney Vero cells (ATCC#CCL-81) were grown at 37°C, 5% CO<sub>2</sub> in DMEM (Sigma) supplemented with 10% FBS (Hyclone) and antibiotic. Cells were maintained in accordance with general cell culture practices.

### ***Viral Stock Preparations***

#### Dengue Viruses

C6/36 cells were passaged into T150 flasks at  $1 \times 10^6$  cells/mL. The following day, cultures were inoculated with 500 $\mu$ L of virus in 4.5mL serum-free growth media. After 1 hour incubation period with rocking, 15mLs of growth media supplemented with 2% FBS (Hyclone) and 5mM HEPES was added. 48 hours post-inoculation, supernatants were removed and replaced with fresh 2% growth media. 72 hours later, supernatants were collected, cleared of cellular debris by centrifugation, aliquoted and stored at -80°C. Yellow Fever 17D Vero cells were passaged into T150 flasks at  $1 \times 10^5$  cells/mL. The following day, cultures were inoculated with 500 $\mu$ L of virus in 4.5mL serum-free growth media. After 1 hour incubation period with rocking, 15mLs of growth media supplemented with 2% FBS (Hyclone) and 5mM HEPES was added. 48 hours post-inoculation, supernatants were removed and replaced with fresh 2% growth media. 72 hours later, supernatants were collected, cleared of cellular debris by centrifugation, aliquoted



and stored at -80°C.

Coxsackie B3 (Strain 20)

HeLa (R19) cells were passaged into T150 flasks at  $1 \times 10^5$  cells/mL. The following day, cultures were inoculated with 500 $\mu$ L of virus in 4.5mL serum-free growth media. After 1 hour incubation period with rocking, 15mLs of growth media supplemented with 2% FBS (Hyclone) was added. 48 hours later, supernatants were collected, cleared of cellular debris by centrifugation, aliquoted and stored at -80°C.

### ***Plaque Assays***

Vero cells were plated onto 24 well plates at a density of  $1 \times 10^5$  cells/well. The next day, media was aspirated and 100 $\mu$ L of serial dilutions of viral supernatant was added to the Vero monolayers for 1hr at 37°C with rocking every 15min. Following adsorption, 0.5mLs of a 1:1 Tragacanth Gum (Sigma)/2x EMEM (CellTech) overlay solution supplemented with 2% FBS (Hyclone) was added to each well and the plates were allowed to incubate for 4-5 days. At the end of this period, overlay was removed and the cells were fixed with fresh 4% paraformaldehyde (Sigma) for 15min at room temperature (RT). The supernatant was then removed and 0.5% Triton X-100 (Sigma) in PBS was added for 15min at RT. Cells were then incubated in block solution (PBS supplemented with 0.1% Tween-20 and 1% Normal Donkey Serum) for 1 hour at RT. Primary antibody targeting the dengue envelope protein (4G2) diluted 1:2000 in block solution was then added for 1 hour followed by three washes with PBS supplemented with 0.1% Tween. HRP-conjugated anti-mouse secondary (Amersham) diluted 1:2000 in block solution was then added to the cells for 1hr at RT followed by three washes with PBS supplemented with 0.1% Tween. Viral foci were then stained with 0.5mLs of VIP

Substrate (Vector Labs) in PBS at RT according to manufacturer's protocol. Once stained, substrate was removed and the monolayers allowed to air dry prior to counting of triplicate samples.

### ***Adaptation of DEN2-NGC to Drosophila***

In order to take advantage of resources available in *Drosophila melanogaster*, we infected *D. melanogaster* D.Mel-2 cells, a sub-clone of S2 cells, with DEN1-WestPac74, DEN2-NGC, DEN2-16681, DEN3-CH5349, or DEN4-TVP360 (all kindly provided by Dr. A. de Silva UNC-Chapel Hill). Only DEN2-NGC gave significant levels of E protein expression and credible evidence of viral propagation, albeit at very low levels. DEN2NGC was adapted by serial passage in D.Mel-2 cells resulting in the viral stock DEN2S2. Passaged virus was then amplified in C6/36 three times to produce a single viral stock for all D2S2 experiments described in the text. DEN2-S2 propagated in D.Mel-2 cells 10-100 times better than DEN2-NGC (Supplementary Fig. 2a). While its ability to productively infect *A. albopictus* C6/36 cells was equivalent to that of DEN2-NGC, DEN2-S2 was attenuated in Vero cells (Supplementary Fig. 2b, c). Sequence analysis indicates that DEN2-S2 is 99.6% identical to the parental strain at the nucleotide level (DEN2-S2 sequence available upon request).

### ***RNAi based screening***

Screening in dipteran cells was performed using the *Drosophila* RNAi Screening Center (DRSC, Harvard Medical School) Genome-wide RNAi Library (DRSC 2.0) in 384-well plate format. The DRSC 2.0 library consists of 22,632 dsRNAs aliquoted into 62 384well plates. Library was screened in duplicate. Library plates, pre-aliquoted with dsRNAs, were thawed at

room temperature followed by centrifugation at 180xg in a Beckman GS-6R centrifuge for 2min at 20°C. 100ng of control dsNS1 (targeting the DEN2-S2 genome) in 5µL dH<sub>2</sub>O was added to 4 wells per plate. *Drosophila* D.Mel-2 cells, a subclone of S2 cells, (Invitrogen #10831-014) were plated at an initial density of 7000 per well in 40µL Sf-900 II SFM (Gibco#10902) using a Matrix Wellmate automated cell dispenser (Matrix). After 48 hours incubation at 28°C, the cells were infected with 10µL of Dengue-S2 virus (4,780IFU). After 72 hours incubation at 28°C, the cells were processed for immunofluorescence as described below. Screening in HuH-7 human cells was performed in 384-well format using siRNAs obtained from Qiagen. 1µmol of each siRNA was aliquoted into the assay plate in 5µL of water. 9.95µL of OPTI-MEM I (Gibco #11058) media was complexed with 0.05µL of Lipofectamine RNAiMAX (Invitrogen#13778-150) per well and incubated for 30 minutes before addition to siRNA containing well. 1500 HuH-7 cells were then plated into each of the assay wells in 50µL DMEM (Gibco #11995) supplemented with 5% FBS (Gibco#16140) and Pen/strep (Gibco#15140) to yield a total volume of 65µL and an effective siRNA concentration of 15.4nM. After 48 hrs incubation at 37°C, cells were infected with DEN2-NGC at an MOI ~ 1.4ifu/cell and incubated an additional 48 hrs before fixation and processing for immunofluorescence as described below. Similarly, HuH-7 cells were incubated 72 hours post-siRNA transfection followed by 24 hour yellow fever virus 17D infection at an MOI of ~6.5 ifu/cell or 6 hour Cocksackievirus B3 strain 20 infection at an MOI of ~ 40.9 ifu/cell.

### ***Mosquito rearing and cell line culture***

Rockefeller/UGAL strain *Aedes aegypti* mosquitoes were maintained in the insectary facility at 27°C and 80% humidity with a 12-12 hour photoperiod. After egg hatching, larvae were maintained in plastic containers with distilled water and fed with pulverized fish food. Pupae were collected and transferred to cages provided with 10% sucrose, where adults stayed after emergence. The *Ae. albopictus* C6/36 cell line was maintained in 25cm<sup>2</sup> culture flasks kept inside an incubator at 32°C with 5% CO<sub>2</sub>. The medium utilized to grow the cells was composed by minimal essential medium (MEM), 10% heat inactivated FBS, 1% L-glutamine, and 1% non-essential amino acids.

### ***DENV-2 infection of mosquitoes***

DENV-2 from the New Guinea C strain was propagated in C6/36 cells following standard procedures<sup>1</sup>. For this, C6/36 cells were grown in 75-cm<sup>2</sup> flasks until they reached 80 % of confluence. Following, the cells were infected with virus with a multiplicity of infection (MOI) of 3.5 virus particles/cell. Infected cells were incubated for 7 days at 32°C with 5% CO<sub>2</sub>, after which they were harvested with a cell scraper and lysed by repeated freezing and thawing in dry CO<sub>2</sub> and a 32°C water bath to release the viral particles. The virus suspension was then mixed with equal amount of commercial human blood and 10% human serum, kept at 32°C for 30 min and immediately used to feed double-stranded RNA injected female *A. aegypti* (<http://www.jove.com/index/Details.stp?ID=220>). All procedures involving DENV-2 infections were carried out in a Biological Safety Level 2 laboratory.

### ***Mosquito gene-silencing assays***

RNA interference (RNAi)-mediated gene-silencing assays were carried out according to standard methodology<sup>2</sup>. For this, approximately 69  $\eta$ l of a dsRNA suspension (3  $\mu$ g/ $\mu$ l in water) were injected into the thorax of cold-anesthetized 3- to 4-day-old female mosquitoes using a nano-injector as previously described

(<http://www.jove.com/index/Details.stp?ID=230>). Double-stranded RNA injected females were kept in small cups provided with 10% sucrose in the insectary at the conditions mentioned above. Three days after injection, mosquitoes were fed on a DENV-2-supplemented blood meal. For virus titer measurement, mosquitoes were briefly collected and washed in 70% ethanol, and then rinsed in sterile distilled water, at 7 days after blood meal. Mosquito dissections were done in sterile PBS under a stereo microscope, and the midguts were transferred to microcentrifuge tubes containing 150  $\mu$ l of MEM. The tissues were then homogenized with a pellet pestle in a sterile environment. Six independent biological replicate assays were produced for each tested gene.

### ***qPCR analysis of viral RNA***

Total RNA from infected cells was isolated using Trizol (Invitrogen). cDNA was generated using random hexamers to prime reverse transcription reactions using MMLV reverse transcriptase (Invitrogen). cDNAs were then diluted 1:10 with nuclease-free water. RTqPCR was performed with the cDNA using the iQ<sup>TM</sup> SYBR Green Supermix Kit (Bio-Rad) according to the manufacturer's instructions. Reactions were run on a MyiQ<sup>TM</sup> iCycler (Bio-Rad) and analyzed with the MyiQ<sup>TM</sup> Optical System Software (Bio-Rad). qPCR conditions were an initial 95°C for 5 min., followed by 40 cycles of 95°C for 15sec. and 60°C for 30sec. Primers are: DV2C\_FWD 5'-AATATGCTGAAACGCGAGAGA-3' DV2C-REV 5'-

GGGATTGTTAGGAAACGAAGG-3' GAPDH\_FWD 5'-GAGTCAACGGATTTGGTCGT-3'  
GAPDH-REV 5'-TTGATTTTGGAGGGATCTCG-3' Standard curves for copy number  
determination were generated using DENV2-NGC and GAPDH containing plasmid DNA. For  
each sample the DENV2 RNA copy number was normalized to the GAPDH RNA copy  
number.

### ***Immunofluorescence***

Cells were fixed with fresh 4% paraformaldehyde (Sigma) for 15min at RT. The supernatant  
was then removed and 0.5% Triton X-100 (Sigma) in PBS was added for 15min at RT. Cells  
were then incubated in block solution (PBS supplemented with 0.1% Tween-20 and 1%  
Normal Donkey Serum) for 1 hour at RT. Primary antibody targeting the dengue envelope  
protein (4G2) diluted 1:2000 in block solution was then added for 1 hour followed by washes  
with PBS supplemented with 0.1% Tween. Alexa-488 conjugated, anti-mouse secondary  
antibody (Invitrogen#A11017) diluted 1:2000 in block solution supplemented with 13.3µg/ml  
of Hoescht 33342 (Sigma) was then added for 1 hour followed by three PBS/0.1%Tween wash  
steps. Wells were then filled with PBS, sealed and imaged on the Cellomics ArrayScan Vti  
HCS. Immunofluorescent staining for yellow fever virus 17D was performed exactly the same  
as above. Immunofluorescent staining for Coxsackievirus B3 strain 20 was similar to above  
except the primary antibody was Dako Monoclonal Mouse Anti-Enterovirus Code M7064. The  
110mg/L stock was diluted 1:200 in blocking solution.

### ***High-content cell based imaging***

Screening plates were imaged and analyzed using a Cellomics ArrayScan Vti HCS automated  
fluorescent imaging system (ThermoFisher). DMel-2 cell images were acquired at 20x

magnification. HuH-7 cells were acquired at 10x magnification. Infected DMel-2 cells were defined in one of two ways, using the reference wells (RF; wells with a dsRNA targeting the DEN2-S2 NS1 genomic region), or a filter we named the daily filter (DF). RF identification defined infected cells as those cells which displayed an average fluorescent intensity that was three standard deviations higher than the mean of the average fluorescent intensity of the dsNS1 treated cell population in the reference wells within the same plate (Figure S2). DF identification involved manually defining the threshold fluorescent intensity of an infected cell from the wells treated with a dsRNA targeting GFP on a plate by plate basis. Only cells that were unambiguously above background levels of staining were selected. Once the threshold was determined, it was then checked against the dsNS1 treated wells in the same plate to ensure no background level staining remained in the selected population. The DF was more stringent than the RF method.

### ***Sum Rank Algorithm***

During analysis of the D. Mel-2 screen, we observed that infectivity rates 1) were not normally distributed within each plate and 2) varied substantially in magnitude between plates (data not shown). Parametric tests based on the assumption of normality or drawing from similar distributions, such as t-tests or z-scores, were therefore considered inappropriate. We developed a nonparametric approach, the Sum Rank algorithm, in order to produce an appropriate summary statistic of each dsRNA tested in duplicate using two separate 384 well plates. Preliminary analyses also suggested that low cell density (valid object counts as determined by counting nuclei stained with Hoechst) could affect percent infectivity data (data not shown). Therefore dsRNA wells with fewer than 12500 cells/well were removed from the Sum Rank analysis, along with the 16 control wells present on every plate, to prevent bias

within the screen. Within each plate, wells were ranked by the percentage of infected cells, with the well with the lowest percentage infected cells given rank = 1. For each dsRNA, tested in duplicate, we calculated a Sum Rank statistic (eq 1).

**Sum Rank = Rank on plate #1 + Rank on plate #2 (eq 1)**

The null distribution for the Sum Rank statistic was mathematically derived, validated through Monte Carlo simulations in R, and experimentally confirmed during the screen (Supplementary Fig. 4). The null hypothesis of the Sum Rank test is that infectivity rank within a plate is randomly distributed, or equivalently that all wells are equally infectable. This assumption can be invalid if there are local biases in infectivity within a plate, for example if edges are infected more than center wells. Such effects are present in most genomic screens, including our assay. As a result we may have false positive or false negative rates higher than would be predicted by theory alone. We have not yet assessed the magnitude or implication of such spatial biases within duplicate plates, but believe it is important to acknowledge that such effects are common in genome-wide screens and should be discussed openly to promote improvement of future screens. Spatial biases can be expected to affect any statistical analyses and not just the Sum Rank method. In brief, the Sum Rank score can range from 2 to twice the number of valid wells on a plate (384 – 16 controls = 368 maximum valid wells). Sum Ranks at either extreme are less likely to be observed by random chance. The number of times a given Sum Rank (SR) is expected to occur near the lower extreme (Sum Rank = 2) for a single pair of duplicate plates is given by Equation 2.

**$E[SR] = (SR - 1) / (\# \text{ Valid Wells})$  (eq 2)**

The number of times a given Sum Rank is expected to occur near the high extreme (Sum Rank = (2 \* Number of Valid Wells)) follows a symmetrical distribution and is given by Equation 3.



$E[SR] = ((\# \text{Valid Wells} * 2) - (SR - 1)) / (\# \text{Valid Wells})$  (eq 3) Sum Ranks were calculated for every dsRNA in the *Drosophila* genome, with  $E[SR]$  scores below 0.065 used to select potential targets (218 dsRNAs) for further analysis.

### References for methods

1. Troyer, J. M. et al. A live attenuated recombinant dengue-4 virus vaccine candidate with restricted capacity for dissemination in mosquitoes and lack of transmission from vaccinees to mosquitoes. *Am J Trop Med Hyg* 65, 414-9 (2001).
2. Dong, Y. et al. Anopheles gambiae immune responses to human and rodent Plasmodium parasite species. *PLoS Pathog* 2, e52 (2006).

**Supplementary Table 1. Dipteran DVHFs listed by gene name**

| <b>Gene</b>   | <b>CGs</b>                      | <b>FBGN</b> | <b>DRSC Amplicon</b> | <b>FOLD DECREASE</b> | <b>p Value</b> | <b>19 bp Matches</b> |
|---------------|---------------------------------|-------------|----------------------|----------------------|----------------|----------------------|
| alpha-Adaptin | CG4260,<br>CG31654              | FBgn0015567 | DRSC27715            | 2.3                  | 1.8E-02        | 0                    |
| alpha-Est10   | CG1131                          | FBgn0015569 | DRSC12613            | 2.7                  | 2.3E-04        | 1                    |
| Antp          | CG1028                          | FBgn0000095 | DRSC23104            | 3.2                  | 6.7E-03        | 11                   |
| Apc           | CG1451                          | FBgn0015589 | DRSC14114            | 1.9                  | 4.1E-03        | 0                    |
| Art7          | CG9882                          | FBgn0034817 | DRSC26145            | 2.1                  | 2.4E-03        | 0                    |
| bol           | CG4760,<br>CG4727               | FBgn0011206 | DRSC08964            | 2.4                  | 1.3E-03        | 0                    |
| brm           | CG18438,<br>CG5942              | FBgn0000212 | DRSC11330            | 3.0                  | 2.7E-03        | 1                    |
| CG10320       | CG10320                         | FBgn0034645 | DRSC04060            | 5.4                  | 3.3E-04        | 0                    |
| CG10713       | CG10713                         | FBgn0036360 | DRSC24532            | 734.8                | 4.3E-04        | 0                    |
| CG10738       | CG10738                         | FBgn0036368 | DRSC09792            | 1.7                  | 7.3E-03        | 2                    |
| CG10918       | CG10918                         | FBgn0031178 | DRSC24162            | 1.6                  | 4.2E-02        | 0                    |
| CG10948       | CG10948                         | FBgn0036317 | DRSC09806            | 3.3                  | 6.9E-05        | 0                    |
| CG11694       | CG11694                         | FBgn0037571 | DRSC24061            | 2.0                  | 1.8E-02        | 0                    |
| CG1193        | CG1193                          | FBgn0037375 | DRSC25414            | 4.0                  | 3.8E-03        | 0                    |
| CG12517       | CG12517                         | FBgn0032311 | DRSC02173            | 1.9                  | 2.6E-02        | 0                    |
| CG12868       | CG12868                         | FBgn0033945 | DRSC06207            | 2.1                  | 2.3E-03        | 1                    |
| CG12932       | CG12932                         | FBgn0033419 | DRSC06245            | 1.6                  | 1.7E-02        | 1                    |
| CG12942       | CG12942                         | FBgn0033569 | DRSC06253            | 10.9                 | 1.1E-04        | 1                    |
| CG12964       | CG12964                         | FBgn0034022 | DRSC23210            | 4.9                  | 2.6E-03        | 1                    |
| CG13606       | CG13606                         | FBgn0039161 | DRSC14609            | 22.9                 | 7.2E-07        | 0                    |
| CG13707       | CG13707                         | FBgn0035578 | DRSC08316            | 2.5                  | 5.1E-04        | 0                    |
| CG14071       | CG14071                         | FBgn0032312 | DRSC02374            | 3.2                  | 1.7E-03        | 0                    |
| CG14212       | CG14212                         | FBgn0031045 | DRSC19568            | 3.9                  | 1.6E-04        | 1                    |
| CG14476       | CG14476                         | FBgn0027588 | DRSC21036            | 4.8                  | 3.4E-04        | 0                    |
| CG14521       | CG14521                         | FBgn0039617 | DRSC14873            | 4.6                  | 2.8E-05        | 0                    |
| CG14667       | CG14667                         | FBgn0037317 | DRSC12253            | 1.7                  | 6.8E-03        | 2                    |
| CG14675       | CG14675                         | FBgn0037385 | DRSC12261            | 2.5                  | 4.1E-04        | 0                    |
| CG14851       | CG14851                         | FBgn0038240 | DRSC21500            | 10.7                 | 9.7E-04        | 1                    |
| CG14894       | CG14894                         | FBgn0038428 | DRSC26111            | 3.3                  | 1.3E-03        | 0                    |
| CG15122       | CG15122                         | FBgn0034457 | DRSC26227            | 3.3                  | 3.2E-04        | 0                    |
| CG15262       | CG15262                         | FBgn0028852 | DRSC01975            | 2.6                  | 4.1E-04        | 0                    |
| CG15296       | CG15296                         | FBgn0030215 | DRSC26051            | 3.2                  | 1.5E-03        | 0                    |
| CG15564       | CG15564                         | FBgn0039833 | DRSC15102            | 4.2                  | 3.3E-05        | 0                    |
| CG15661       | CG15661                         | FBgn0034605 | DRSC04252            | 1.7                  | 3.6E-02        | 2                    |
| CG17065       | CG17065                         | FBgn0031099 | DRSC20544            | 128.1                | 8.1E-05        | 1                    |
| CG17086       | CG17086                         | FBgn0032310 | DRSC02566            | 1.6                  | 2.8E-02        | 1                    |
| CG17600       | CG17600,<br>CG17602             | FBgn0031195 | DRSC20640            | 4.1                  | 1.0E-04        | 0                    |
| CG18166       | CG18166                         | FBgn0029526 | DRSC17271            | 2.6                  | 1.3E-02        | 2                    |
| CG3176        | CG3176                          | FBgn0029524 |                      |                      |                |                      |
| CG32817       | CG32817                         | FBgn0052817 |                      |                      |                |                      |
| CG2124        | CG2124                          | FBgn0030217 | DRSC18208            | 3.6                  | 1.5E-04        | 0                    |
| CG2574        | CG2574                          | FBgn0030386 | DRSC19862            | 16.6                 | 1.7E-05        | 0                    |
| CG3061        | CG3061                          | FBgn0038195 | DRSC26419            | 1.8                  | 7.4E-03        | 0                    |
| CG31048       | CG31048,<br>CG14530,<br>CG11754 | FBgn0051048 | DRSC14373            | 2.0                  | 1.9E-03        | 3                    |
| CG31639       | CG31639                         | FBgn0051639 | DRSC00910            | 2.9                  | 5.4E-04        | 1                    |
| CG31860       | CG31860,<br>CG17215             | FBgn0051860 | DRSC02591            | 13.6                 | 3.2E-06        | 0                    |
| CG32052       | CG32052,                        | FBgn0044328 | DRSC27465            | 2.1                  | 4.7E-03        | 0                    |

|                        |                                                                                                         |                                             |           |       |         |    |
|------------------------|---------------------------------------------------------------------------------------------------------|---------------------------------------------|-----------|-------|---------|----|
| CG8163                 |                                                                                                         |                                             |           |       |         |    |
| CG32182                | CG32182                                                                                                 | FBgn0052182                                 | DRSC09508 | 1.9   | 1.7E-02 | 3  |
| CG32207                | CG32207                                                                                                 | FBgn0052207                                 | DRSC09617 | 2.0   | 5.5E-03 | 11 |
| CG33255                | CG33255                                                                                                 | FBgn0053255                                 |           |       |         |    |
| CG32642                | CG32642                                                                                                 | FBgn0052642                                 | DRSC18959 | 2.0   | 4.9E-02 | 1  |
| CG3281                 | CG3281                                                                                                  | FBgn0037967                                 | DRSC28414 | 2.0   | 3.2E-02 | 0  |
| CG33129 *              | CG33129,<br>CG6089,<br>CG6087                                                                           | FBgn0053129                                 | DRSC02924 | 2.1   | 1.0E-02 | 1  |
| CG33263                | CG33263,<br>CG14106                                                                                     | FBgn0053263                                 | DRSC10108 | 1.5   | 3.4E-02 | 0  |
| CG33300                | CG33300                                                                                                 | FBgn0053300                                 | DRSC01101 | 7.6   | 2.3E-05 | 1  |
| CG34248                | CG34248                                                                                                 | FBgn0085277                                 | DRSC09426 | 1.9   | 7.2E-03 | 0  |
| CG4065                 | CG4065                                                                                                  | FBgn0034982                                 | DRSC26149 | 2.0   | 2.4E-03 | 0  |
| CG4726                 | CG4726                                                                                                  | FBgn0031307                                 | DRSC00664 | 3.2   | 1.2E-04 | 1  |
| CG4957                 | CG4957                                                                                                  | FBgn0032205                                 | DRSC02793 | 2.1   | 2.3E-03 | 1  |
| CG5205                 | CG5205                                                                                                  | FBgn0038344                                 | DRSC15736 | 2.9   | 4.7E-04 | 0  |
| CG6569                 | CG6569                                                                                                  | FBgn0038909                                 | DRSC16067 | 1.7   | 1.6E-02 | 0  |
| CG6744                 | CG6744                                                                                                  | FBgn0037901                                 | DRSC25938 | 3.3   | 1.2E-04 | 0  |
| CG6845                 | CG6845                                                                                                  | FBgn0035099                                 | DRSC26319 | 1.8   | 2.5E-02 | 0  |
| CG6847                 | CG6847                                                                                                  | FBgn0030884                                 | DRSC20009 | 9.2   | 1.2E-05 | 2  |
| CG7579                 | CG7579                                                                                                  | FBgn0036528                                 | DRSC10885 | 1.5   | 2.7E-02 | 0  |
| CG7720                 | CG7720                                                                                                  | FBgn0038652                                 | DRSC16306 | 6.2   | 1.2E-05 | 0  |
| CG9014                 | CG9014                                                                                                  | FBgn0028847                                 | DRSC01979 | 5.2   | 2.1E-05 | 0  |
| CG9236                 | CG9236                                                                                                  | FBgn0034558                                 | DRSC04535 | 1.7   | 1.5E-02 | 0  |
| CG9801                 | CG9801                                                                                                  | FBgn0037623                                 | DRSC16568 | 2.3   | 9.1E-04 | 0  |
| CG9896                 | CG9896                                                                                                  | FBgn0034808                                 | DRSC04594 | 1.9   | 4.1E-03 | 0  |
| Cht3                   | CG18140                                                                                                 | FBgn0022701                                 | DRSC03766 | 1.7   | 3.5E-02 | 0  |
| cnir                   | CG17262                                                                                                 | FBgn0243513                                 | DRSC26787 | 3.0   | 2.5E-03 | 0  |
| CR14638                | CG14638                                                                                                 | FBgn0037223                                 | DRSC12224 | 1.8   | 4.2E-03 | 1  |
| CR33319                | CG18078                                                                                                 | FBgn0053319                                 | DRSC01826 | 14.6  | 5.2E-05 | 2  |
| Cyp6a19                | CG10243                                                                                                 | FBgn0033979                                 | DRSC07379 | 4.8   | 1.8E-04 | 0  |
| Dhc36C                 | CG5526                                                                                                  | FBgn0013810                                 | DRSC03315 | 2.5   | 4.7E-03 | 0  |
| DnaJ-1                 | CG10578                                                                                                 | FBgn0015657                                 | DRSC11145 | 2.0   | 4.0E-03 | 0  |
| fd96Cb                 | CG11922                                                                                                 | FBgn0004898                                 | DRSC25322 | 163.3 | 4.5E-04 | 0  |
| Gr66a                  | CG7189                                                                                                  | FBgn0035870                                 | DRSC10783 | 2.0   | 1.7E-02 | 0  |
| H15                    | CG6604                                                                                                  | FBgn0016660                                 | DRSC22199 | 2.0   | 3.9E-02 | 28 |
| HP1c                   | CG6990                                                                                                  | FBgn0039019                                 | DRSC28423 | 2.7   | 1.1E-02 | 0  |
| Incenp                 | CG12165                                                                                                 | FBgn0033156                                 | DRSC06116 | 1.8   | 3.0E-02 | 1  |
| ind                    | CG11551                                                                                                 | FBgn0025776                                 | DRSC23095 | 2.6   | 1.2E-02 | 0  |
| Krn                    | CG32179,<br>CG8056                                                                                      | FBgn0052179                                 | DRSC11202 | 2.0   | 2.3E-03 | 0  |
| l(1)G0255              | CG4094                                                                                                  | FBgn0028336                                 | DRSC18344 | 2.2   | 6.8E-03 | 1  |
| lbk                    | CG8434                                                                                                  | FBgn0034083                                 | DRSC07178 | 5.6   | 4.4E-05 | 0  |
| lola                   | CG30013,<br>CG12052,<br>CG18379,<br>CG30014,<br>CG18380,<br>CG18378,<br>CG18376,<br>CG18381,<br>CG30012 | FBgn0005630                                 | DRSC05222 | 17.6  | 5.8E-06 | 1  |
| lqf                    | CG32386,<br>CG8532                                                                                      | FBgn0028582                                 | DRSC11363 | 2.8   | 5.4E-04 | 2  |
| LysB,<br>LysC,<br>LysD | CG1179,<br>CG9111,<br>CG9118                                                                            | FBgn0004425,<br>FBgn0004426,<br>FBgn0004427 | DRSC21249 | 1.6   | 2.8E-02 | 3  |

|                |                                                         |             |           |      |         |    |
|----------------|---------------------------------------------------------|-------------|-----------|------|---------|----|
| Iz             | CG1689                                                  | FBgn0002576 | DRSC18790 | 25.6 | 3.8E-05 | 12 |
| mld            | CG33343,<br>CG34100,<br>CG9469,<br>CG13620,<br>CG31312  | FBgn0083077 | DRSC13681 | 2.7  | 1.6E-02 | 26 |
| Msi            | CG32178                                                 | FBgn0043025 | DRSC09507 | 2.0  | 9.0E-03 | 0  |
| nAcRalpha-96Aa | CG5610                                                  | FBgn0000036 | DRSC13672 | 2.5  | 1.5E-02 | 10 |
| Ntf-2          | CG1740                                                  | FBgn0031145 | DRSC20552 | 1.5  | 4.4E-02 | 1  |
| Nup58          | CG7360                                                  | FBgn0038722 | DRSC27863 | 6.4  | 7.3E-03 | 0  |
| Obp56h         | CG13874                                                 | FBgn0034475 | DRSC06433 | 2.3  | 8.8E-04 | 1  |
| Oda            | CG16747                                                 | FBgn0014184 | DRSC07626 | 5.3  | 4.8E-04 | 1  |
| Pdsw           | CG8844                                                  | FBgn0021967 | DRSC00715 | 4.3  | 5.9E-05 | 0  |
| phr6-4         | CG2488                                                  | FBgn0016054 | DRSC26873 | 2.5  | 4.0E-04 | 0  |
| phyl           | CG10108                                                 | FBgn0013725 | DRSC07663 | 1.5  | 2.5E-02 | 1  |
| Pu             | CG9441                                                  | FBgn0003162 | DRSC04645 | 1.7  | 3.4E-02 | 1  |
| pxb            | CG14874,<br>CG33207,<br>CG14873                         | FBgn0053207 | DRSC22225 | 2.0  | 3.9E-02 | 0  |
| rn             | CG32466,<br>CG10040,<br>CG14600,<br>CG14603,<br>CG14601 | FBgn0003263 | DRSC12544 | 2.1  | 8.7E-04 | 35 |
| Sec61beta      | CG10130                                                 | FBgn0010638 | DRSC21512 | 3.7  | 5.0E-03 | 3  |
| Sos            | CG7793                                                  | FBgn0001965 | DRSC03439 | 2.0  | 4.7E-03 | 5  |
| Su(Tpl)        | CG32217,<br>CG8037                                      | FBgn0014037 | DRSC10954 | 5.3  | 1.3E-04 | 1  |
| synaptogyrin   | CG10808                                                 | FBgn0033876 | DRSC06003 | 2.2  | 8.4E-04 | 0  |
| Syx13          | CG11278                                                 | FBgn0036341 | DRSC09836 | 1.8  | 4.8E-03 | 1  |
| Syx4           | CG2715                                                  | FBgn0024980 | DRSC27586 | 2.0  | 5.8E-03 | 0  |
| Taf4           | CG5444                                                  | FBgn0010280 | DRSC11297 | 3.2  | 1.4E-04 | 1  |
| tafazzin       | CG8766                                                  | FBgn0026619 | DRSC07704 | 1.5  | 3.1E-02 | 0  |
| Tdc1           | CG30445,<br>CG3686                                      | FBgn0050445 | DRSC04942 | 2.2  | 2.2E-03 | 0  |
| tRNA:CR31143   | CR31143                                                 | FBgn0051143 | DRSC13633 | 3.5  | 6.0E-03 | 13 |
| Unr            | CG7015                                                  | FBgn0035895 | DRSC10761 | 2.8  | 3.1E-04 | 1  |
| Vago           | CG2081                                                  | FBgn0030262 | DRSC26320 | 2.2  | 1.4E-03 | 0  |
| vanin-like     | CG3648,<br>CG32754                                      | FBgn0040069 | DRSC17440 | 2.7  | 1.1E-02 | 0  |
| Vha14          | CG8210                                                  | FBgn0010426 | DRSC07571 | 2.6  | 2.2E-04 | 0  |
| VhaAC39        | CG2934                                                  | FBgn0028665 | DRSC27608 | 3.1  | 7.3E-03 | 0  |
| VhaPPA1-1 *    | CG7007                                                  | FBgn0028662 | DRSC16170 | 10.9 | 4.3E-06 | 0  |

**Supplementary Table 2. DVHF identified in Huh-7 cells.**

| HUGO ID  | pValue (infectivity) <sup>1</sup> | Fold Change (infectivity) | %Fld Chng/ VO Fld chng <sup>2</sup> | siRNA Sequence         |
|----------|-----------------------------------|---------------------------|-------------------------------------|------------------------|
| ATP6AP1  | 8.9E-10                           | 7.7                       | 4.4                                 | CACAGTGACATTCAAGTTCAT  |
| ATP6AP2  | 1.4E-08                           | 3.8                       | 2.3                                 | GGGAACGAGTTTAGTATATTA  |
| ATP6V0A2 | 7.0E-05                           | 1.6                       | 0.8                                 | CAGGAAATTAATAGAGCTGAT  |
| ATP6V0A4 | 1.0E-05                           | 1.8                       | 0.9                                 | CACATTTAACAGGACCAATAA  |
| ATP6V0B  | 3.8E-10                           | 11.8                      | 2.2                                 | CATGGCAATTGTCATTAGCAA  |
| ATP6V0B  | 1.8E-05                           | 1.7                       | 0.6                                 | CCCAGCCTCTTTGTAAAGATT  |
| ATP6V0C  | 1.1E-07                           | 2.6                       | 3.1                                 | CAGCCACAGAATATTATGTAA  |
| ATP6V0C  | 1.5E-06                           | 2.1                       | 1.9                                 | CTGGATGTTTATTTATAAAGA  |
| ATP6V0D1 | 5.1E-09                           | 4.3                       | 2.9                                 | CACTTTCATGTTCCCTCCCTAA |
| ATP6V0D1 | 3.6E-07                           | 2.4                       | 0.5                                 | CCGCGCCTTCATCATCACCAT  |
| ATP6V0E1 | 4.3E-06                           | 1.9                       | 0.7                                 | AACCCTCTCTTTGGACCGCAA  |
| ATP6V0E2 | 2.8E-05                           | 1.6                       | 1.3                                 | AAGGGATATGTGAGATCCAAA  |
| ATP6V1B1 | 1.3E-10                           | 40.6                      | 13.2                                | CCGGGTCAAGTTTGCCAGTA   |
| ATP6V1B1 | 3.3E-10                           | 12.1                      | 7.1                                 | CCCGGCAGTAGCTGCAACCTA  |
| ATP6V1B2 | 1.5E-10                           | 34.2                      | 15.9                                | CACGGTTAATGAAGTCTGCTA  |
| ATP6V1B2 | 1.6E-10                           | 25.5                      | 6.0                                 | CTCGATTACTCAAATCCCTAT  |
| ATP6V1C2 | 5.6E-08                           | 4.7                       | 1.0                                 | CAGGTATGGACTACCAGTGAA  |
| ATP6V1C2 | 3.9E-07                           | 2.3                       | 1.7                                 | CTGGAGAGGATGAATACTGTA  |
| ATP6V1D  | 3.3E-05                           | 2.4                       | 0.7                                 | AAAGAAGATAATAGAGACTAA  |
| ATP6V1G2 | 1.1E-08                           | 3.8                       | 2.5                                 | CACCACCTGCTCACTGGTCAA  |
| ATP6V1G3 | 2.0E-08                           | 3.5                       | 2.2                                 | CAGAATAATCTCTCAGATGAA  |
| ATP6V1H  | 1.7E-10                           | 24.8                      | 7.4                                 | CAGCAGAAGTACGATGATGAA  |
| ATP6V1H  | 5.4E-09                           | 4.1                       | 3.9                                 | CAAGAGATGCTTCAAAGTAA   |
| BTD      | 3.8E-03                           | 1.6                       | 1.2                                 | ATGCGATTGGTCTCAAGCTAA  |
| CHRNA2   | 7.7E-08                           | 3.0                       | 1.7                                 | CAGCCTCTGTTTGACCATGAA  |
| CHRNA2   | 4.1E-05                           | 1.6                       | 1.0                                 | CACGGGCACCTACAACAGCAA  |
| CNOT2    | 7.9E-10                           | 8.3                       | 2.2                                 | CCAGGACTTCTCAATACACAA  |
| CNOT2    | 2.3E-04                           | 1.5                       | 1.1                                 | CTGGAATATGACAAATTAGAA  |
| DCST2    | 1.4E-09                           | 6.9                       | 3.2                                 | CTGCATGATGGTCATACCACA  |
| DCST2    | 4.7E-03                           | 1.5                       | 0.6                                 | CCACTTCTCTGTGGATCTCAA  |
| DDC      | 5.0E-08                           | 3.0                       | 1.1                                 | TCGGCTAAAGGGTTCCAACAA  |
| DDC      | 1.2E-04                           | 1.6                       | 0.8                                 | CAGGCTTATATCCGCAAGCAT  |
| DIAPH3   | 1.1E-06                           | 2.1                       | 1.9                                 | AAGAGTGAATATAGCAACTTA  |
| EXDL2    | 9.4E-08                           | 3.5                       | 1.2                                 | GTGGGTAAATTTGGAAGGCAA  |
| FASTKD5  | 1.5E-09                           | 6.1                       | 3.1                                 | TACAGATGATTGATGAATAA   |
| FH       | 2.0E-08                           | 3.5                       | 2.3                                 | GAGATCTACGATGAACTTTAA  |
| FLJ20254 | 1.5E-10                           | 37.0                      | 12.2                                | CACCTGTGACATGGCCTGCAA  |
| FLJ20254 | 4.6E-10                           | 12.1                      | 8.0                                 | TACAGAAGTCTTTGCAAGAAA  |
| FOXB1    | 1.3E-04                           | 1.8                       | 1.1                                 | TCGCAAACAGCCACCAGCCAA  |
| GALNT10  | 3.3E-05                           | 2.2                       | 0.5                                 | CAGGCAATTAAGTGGCTCAAA  |
| GANAB    | 2.4E-08                           | 3.6                       | 3.2                                 | GAGGTGTGGTATGACATTCAA  |

<sup>1</sup> Infectivity measured as the percentage of cells infected (see Methods)

<sup>2</sup> Ratio of infectivity fold change over cell number fold change.

|          |         |      |      |                        |
|----------|---------|------|------|------------------------|
| GCH1     | 1.5E-05 | 2.0  | 1.8  | CCCGGTTTCCTTTGTGGTCTA  |
| GSX1     | 2.8E-09 | 5.0  | 1.5  | CTCTGTGGACAGCAGCTCTAA  |
| GSX1     | 4.9E-07 | 2.2  | 1.5  | CGAGTTCGCTTCTAATATGTA  |
| HRNR     | 4.7E-08 | 3.2  | 1.5  | CTGGCTCAGGGTGGTCTTCAA  |
| LRIG3    | 1.7E-05 | 1.7  | 1.5  | CAGGAACTTCATCTCAGCCAA  |
| LRIG3    | 2.7E-04 | 1.5  | 1.5  | CAGCTGGACCATAACAACCTA  |
| MAK10    | 1.8E-06 | 2.2  | 1.8  | CAAGATTAATAGATAGAATAA  |
| MAK10    | 4.3E-06 | 2.0  | 1.5  | CAGAAAGGCCGTAGTAGTAAA  |
| MUC2     | 3.1E-09 | 4.7  | 3.4  | CCCCTGGGATTCGAAGTGAA   |
| MUC2     | 2.5E-04 | 1.7  | 0.5  | CCGGTTTGGCAACAACACCAA  |
| NDUFB3   | 5.2E-07 | 4.1  | 1.2  | CAGATTGAGGATGCACATATA  |
| NPR2     | 1.1E-08 | 4.7  | 1.3  | AAGGATGCCCTAGATGAGCTA  |
| NPR2     | 8.7E-08 | 3.5  | 1.6  | ACCCAACCTGAATGAAGAGCTA |
| NRG1     | 6.5E-10 | 8.9  | 4.5  | TCGGCTGCAGGTTCCAAACTA  |
| PHF2     | 2.9E-07 | 3.6  | 2.1  | AAGATGAATCTTCAACTTTAA  |
| PHOSPHO2 | 2.2E-09 | 5.3  | 2.0  | AAGGGTGTAAAGAGAACATGAA |
| PNLIPRP1 | 1.9E-04 | 1.5  | 0.3  | CCCCTGGGTTTGTCTGCATAT  |
| PRG4     | 7.7E-09 | 4.2  | 2.6  | AAGGAAGAAATCAATAAATAT  |
| PRG4     | 3.4E-08 | 3.0  | 3.6  | CAACATGTAATTATTTAATAA  |
| PRR12    | 6.8E-10 | 8.0  | 3.4  | TTCGGTGTACAGAGAAATTAT  |
| PRR12    | 2.2E-04 | 1.5  | 1.1  | AACCGTGTCTCAGGAGCTAA   |
| SEC61B   | 2.1E-09 | 6.1  | 3.8  | CCCAACATTCTTGGACCAA    |
| SEC61B   | 9.0E-09 | 3.8  | 2.9  | AAAGTTGGCCCTGTTCAGTA   |
| SLC5A12  | 2.6E-07 | 2.3  | 2.1  | TGGCTTAATCATGTACTCTCA  |
| SLC5A12  | 4.8E-06 | 1.9  | 0.5  | ATGGATCTCGACTACATATAT  |
| SMPDL3B  | 1.3E-04 | 1.6  | 0.8  | TGGGCGAATTGTGGTCCTCAA  |
| STX12    | 3.2E-04 | 1.8  | 0.7  | TCCCTTAGACATGTACCGGAA  |
| STX4     | 6.1E-05 | 1.7  | 1.1  | CAGCTCGGACGAAGAGGACAA  |
| SYNGR1   | 1.8E-10 | 23.1 | 13.8 | AGCGTCAAGGACCGCAAGAAA  |
| SYNGR1   | 2.1E-03 | 1.5  | 0.4  | CTGGTTCGTGGGATTCTGCTA  |
| TAZ      | 6.2E-10 | 9.3  | 2.8  | CCGCCACATCTGGAACCTGAA  |
| TBX20    | 2.3E-06 | 3.5  | 2.0  | AAAGGTGAAACTACCAACAA   |
| TRIP11   | 8.5E-05 | 1.6  | 1.3  | ATCAAGCGTTACAAGAGACTA  |
| UBE2E3   | 3.0E-08 | 3.8  | 1.8  | CACAATAAACATGCTCCTGAA  |
| ZBTB41   | 5.5E-10 | 8.7  | 1.5  | TCCGTCATGATCACCTTACAA  |
| ZBTB41   | 8.7E-05 | 1.6  | 1.1  | AAGGCAGATAGTATATATATA  |
| ZNF91    | 4.5E-04 | 1.5  | 0.6  | AAGCATTTATATGGTCTTCAA  |

Supplementary Table 3. Dipteran DVHFs and their human homologues

| <b>FBGN</b> | <b>Gene</b>   | <b>Function (Flybase)</b>                                                                                                                                                                                                                                                                                                                                                                                                                                                                                                                                                                                                                                                                                                                                                             | <b>HUGO</b> | <b>Homo sapien's protein name</b>                                           | <b>E-value</b> |
|-------------|---------------|---------------------------------------------------------------------------------------------------------------------------------------------------------------------------------------------------------------------------------------------------------------------------------------------------------------------------------------------------------------------------------------------------------------------------------------------------------------------------------------------------------------------------------------------------------------------------------------------------------------------------------------------------------------------------------------------------------------------------------------------------------------------------------------|-------------|-----------------------------------------------------------------------------|----------------|
| FBgn0015567 | alpha-Adaptin | molecular function is described as: protein transporter activity; AP2A2 protein binding. It is involved in the biological processes: synaptic vesicle transport; asymmetric cell division; neurotransmitter secretion; synaptic vesicle coating; vesicle coating; vesicle-mediated transport; intracellular protein transport; protein complex assembly                                                                                                                                                                                                                                                                                                                                                                                                                               |             | adaptor-related protein complex 2, alpha 2 subunit                          | 0              |
| FBgn0015569 | alpha-Est10   | molecular function is described as: carboxylesterase activity; ACHE cholinesterase activity. The biological processes in which it is involved are not known.                                                                                                                                                                                                                                                                                                                                                                                                                                                                                                                                                                                                                          |             | acetylcholinesterase isoform E4-E5 precursor , and others                   | 2.00E-48       |
| FBgn0000095 | Antp          | molecular function is described as: specific RNA polymerase II HOXB7 transcription factor activity; sequence-specific DNA binding; transcription factor activity. It is involved in the biological processes: specification of segmental identity, antennal segment; midgut development; regulation of transcription from RNA polymerase II promoter; segment specification; heart development; lymph gland development; regulation of transcription, DNA-dependent                                                                                                                                                                                                                                                                                                                   |             | homeobox B7                                                                 | 7.00E-35       |
| FBgn0015589 | Apc           | molecular function is described as: beta-catenin binding; APC microtubule binding; structural constituent of cytoskeleton. It is involved in the biological processes described with 15 unique terms, many of which group under: anatomical structure development; cell adhesion; regulation of Wnt receptor signaling pathway; organ development; central nervous system development; regulation of biological process; organelle organization and biogenesis; instar larval development; programmed cell death; cell proliferation; cell-cell adhesion; embryonic development via the syncytial blastoderm; cell death; larval chitin-based cuticle development; regulation of signal transduction; microtubule-based process; cell motility; cell communication; gamete generation |             | adenomatous polyposis coli                                                  | 5.00E-133      |
| FBgn0034817 | Art7          | molecular function is described as protein-arginine N-PRMT7 methyltransferase activity. It is involved in the biological process peptidyl-arginine methylation, to asymmetrical-dimethyl arginine                                                                                                                                                                                                                                                                                                                                                                                                                                                                                                                                                                                     |             | protein arginine methyltransferase 7                                        | 1.00E-131      |
| FBgn0011206 | bol           | molecular function is described as: mRNA binding; nucleotide BOLL binding. It is involved in the biological processes: male meiosis; spermatogenesis; meiotic G2/MI transition; spermatocyte division; GO:0006445; positive regulation of meiosis                                                                                                                                                                                                                                                                                                                                                                                                                                                                                                                                     |             | boule isoform 1                                                             | 5.00E-33       |
| FBgn0000212 | brm           | molecular function is described as: DNA-dependent ATPase activity; general RNA polymerase II transcription factor activity; transcription coactivator activity; protein binding; DNA helicase activity; nucleic acid binding; ATP binding; DNA binding; helicase activity. It is involved in the biological processes: imaginal disc-derived wing vein specification; chromatin-mediated maintenance of transcription; regulation of transcription from RNA polymerase II promoter; hemocyte proliferation; muscle development; dendrite morphogenesis; neuron development; phagocytosis, engulfment; oogenesis                                                                                                                                                                       | SMARCA4     | SWI/SNF-related matrix-associated actin-dependent regulator of chromatin a4 | 0              |
| FBgn0034645 | CG10320       | molecular function is described as: NADH dehydrogenase activity; NADH dehydrogenase (ubiquinone) activity. It is involved in the biological processes: RNA import into nucleus; mitochondrial electron transport, NADH to ubiquinone                                                                                                                                                                                                                                                                                                                                                                                                                                                                                                                                                  | NDUFB3      | NADH dehydrogenase (ubiquinone) 1 beta subcomplex, 3                        | 2.00E-08       |
| FBgn0036360 | CG10713       | molecular function is unknown. The biological processes in which it is involved are not known                                                                                                                                                                                                                                                                                                                                                                                                                                                                                                                                                                                                                                                                                         | HRNR        | homerin                                                                     | 4.00E-08       |

Supplementary Table 3. Dipteran DVHFs and their human homologues

|             |         |                                                                                                                                                                                                                                                                                                                                                                                                     |                                                                  |           |
|-------------|---------|-----------------------------------------------------------------------------------------------------------------------------------------------------------------------------------------------------------------------------------------------------------------------------------------------------------------------------------------------------------------------------------------------------|------------------------------------------------------------------|-----------|
| FBgn0036368 | CG10738 | molecular function is described as: guanylate cyclase activity; NPR2 receptor activity; ATP binding; protein-tyrosine kinase activity. It is involved in the biological processes: signal transduction; cyclic nucleotide metabolic process; nitric oxide mediated signal transduction; protein amino acid phosphorylation; intracellular signaling cascade; cyclic nucleotide biosynthetic process | natriuretic peptide receptor B precursor                         | 4.00E-175 |
| FBgn0031178 | CG10918 | molecular function is unknown. The biological processes in which it is involved are not known                                                                                                                                                                                                                                                                                                       | No significant similarity found                                  |           |
| FBgn0036317 | CG10948 | molecular function is described as: mRNA binding; nucleic acid binding; nucleotide binding. The biological processes in which it is involved are not known                                                                                                                                                                                                                                          | ecto-NOX disulfide-thiol exchanger 2 isoform b                   | 9.00E-80  |
| FBgn0037571 | CG11694 | molecular function is unknown. The biological processes in which it is involved are not known                                                                                                                                                                                                                                                                                                       | early endosome antigen 1, 162kD                                  | 3.00E-05  |
| FBgn0037375 | CG1193  | molecular function is described as: ATPase activity; microtubule binding; ATP binding. It is involved in the biological processes: microtubule severing; microtubule-based process; intracellular protein transport                                                                                                                                                                                 | katanin p60 subunit A-like 1                                     | 7.00E-116 |
| FBgn0032311 | CG12517 | molecular function is unknown. The biological processes in which it is involved are not known.                                                                                                                                                                                                                                                                                                      |                                                                  |           |
| FBgn0033945 | CG12868 | molecular function is unknown. The biological processes in which it is involved are not known                                                                                                                                                                                                                                                                                                       | No significant similarity found                                  |           |
| FBgn0033419 | CG12932 | molecular function is unknown. The biological processes in which it is involved are not known                                                                                                                                                                                                                                                                                                       | hornerin                                                         | 2.00E-04  |
| FBgn0033569 | CG12942 | molecular function is described as: transcription regulator activity; zinc ion binding; nucleic acid binding. It is involved in the biological processes: cell proliferation; nucleobase, nucleoside, nucleotide and nucleic acid metabolic process; regulation of transcription from RNA polymerase II promoter; transcription from RNA polymerase II promoter                                     | zinc finger and BTB domain containing 41 (NJB Note: lots of ZNF) | 7.00E-31  |
| FBgn0034022 | CG12964 | molecular function is unknown. The biological processes in which it is involved are not known                                                                                                                                                                                                                                                                                                       | PAX interacting protein 1                                        | 6.00E-15  |
| FBgn0039161 | CG13606 | molecular function is unknown. The biological processes in which it is involved are not known                                                                                                                                                                                                                                                                                                       | No significant similarity found                                  |           |
| FBgn0035578 | CG13707 | molecular function is unknown. The biological processes in which it is involved are not known                                                                                                                                                                                                                                                                                                       | No significant similarity found                                  |           |
| FBgn0032312 | CG14071 | molecular function is unknown. The biological processes in which it is involved are not known                                                                                                                                                                                                                                                                                                       | thyroid hormone receptor interactor 11                           | 0.003     |
| FBgn0031045 | CG14212 | molecular function is described as phosphoric monoester hydrolase activity. It is involved in the biological process metabolic process                                                                                                                                                                                                                                                              | phosphatase, orphan 2                                            | 9.00E-25  |
| FBgn0027588 | CG14476 | molecular function is described as alpha-glucosidase activity. It is involved in the biological processes: polysaccharide metabolic process; carbohydrate metabolic process                                                                                                                                                                                                                         | alpha glucosidase II alpha subunit isoform 2                     | 0         |
| FBgn0039617 | CG14521 | molecular function is unknown. It is involved in the biological processes: cell adhesion; cell communication; cell-cell adhesion; signal transduction                                                                                                                                                                                                                                               | neurotrimin isoform 2 (NJB note: lots of orthologs)              | 1.00E-26  |
| FBgn0037317 | CG14667 | molecular function is described as: zinc ion binding; nucleic acid binding. The biological processes in which it is involved are not known                                                                                                                                                                                                                                                          | zinc finger protein 628                                          | 1.00E-08  |
| FBgn0037385 | CG14675 | molecular function is described as: oxygen binding; heme binding; iron ion binding. It is involved in the biological process oxygen transport.                                                                                                                                                                                                                                                      | No significant similarity found                                  |           |
| FBgn0038240 | CG14851 | molecular function is unknown. The biological processes in which it is involved are not known                                                                                                                                                                                                                                                                                                       | PREDICTED: hypothetical protein LOC729471                        | 3.00E-05  |
| FBgn0038428 | CG14894 | molecular function is described as binding. It is involved in the biological processes: protein complex assembly; protein folding; protein metabolic process.                                                                                                                                                                                                                                       | tetratricopeptide repeat domain 1                                | 2.00E-59  |
| FBgn0034457 | CG15122 | molecular function is unknown. The biological processes in which it is involved are not known                                                                                                                                                                                                                                                                                                       | No significant similarity found                                  |           |
| FBgn0028852 | CG15262 | molecular function is described as transcription regulator activity. It is involved in the biological process regulation of transcription                                                                                                                                                                                                                                                           | CCR4-NOT transcription complex, subunit 2                        | 5.00E-19  |



Supplementary Table 3. Dipteran DVHFs and their human homologues

|                                                                                 |                               |                                                                                                                                                                                                                                                                                                                                                                                            |                                                           |           |
|---------------------------------------------------------------------------------|-------------------------------|--------------------------------------------------------------------------------------------------------------------------------------------------------------------------------------------------------------------------------------------------------------------------------------------------------------------------------------------------------------------------------------------|-----------------------------------------------------------|-----------|
| FBgn0030215                                                                     | CG15296                       | molecular function is unknown. The biological processes in which it is involved are not known                                                                                                                                                                                                                                                                                              | No significant similarity found                           |           |
| FBgn0039833                                                                     | CG15564                       | molecular function is unknown. The biological processes in which it is involved are not known                                                                                                                                                                                                                                                                                              | proline rich 12 [                                         | 8.00E-05  |
| FBgn0034605                                                                     | CG15661                       | molecular function is described as glucuronosyltransferase activity. It is involved in the biological process metabolic process                                                                                                                                                                                                                                                            |                                                           |           |
| FBgn0031099                                                                     | CG17065                       | molecular function is described as N-acetylglucosamine-6-phosphate deacetylase activity. It is involved in the biological processes: polysaccharide metabolic process; N-acetylglucosamine metabolic process                                                                                                                                                                               | amidohydrolase domain containing 2                        | 4.00E-129 |
| FBgn0032310                                                                     | CG17086                       | molecular function is unknown. The biological processes in which it is involved are not known                                                                                                                                                                                                                                                                                              |                                                           |           |
| FBgn0031195                                                                     | CG17600                       | molecular function is unknown. The biological processes in which it is involved are not known                                                                                                                                                                                                                                                                                              | diaphanous homolog 3 isoform a                            | 1.00E-04  |
| FBgn0030217                                                                     | CG2124                        | molecular function is unknown. The biological processes in which it is involved are not known                                                                                                                                                                                                                                                                                              | FAST kinase domains 5                                     | 1.00E-18  |
| FBgn0030386                                                                     | CG2574                        | molecular function is described as: ligase activity; ubiquitin-protein ligase activity. It is involved in the biological processes: protein metabolic process; regulation of protein metabolic process; post-translational protein modification.                                                                                                                                           | ubiquitin-conjugating enzyme E2E 3                        | 1.00E-46  |
| FBgn0038195                                                                     | CG3061                        | molecular function is described as: unfolded protein binding; heat shock protein binding. It is involved in the biological processes: defense response; protein folding; protein metabolic process; response to stress                                                                                                                                                                     | DnaJ (Hsp40) homolog, subfamily B, member 12              | 3.00E-81  |
| FBgn0051048                                                                     | CG31048                       | molecular function is described as: small GTPase regulator activity; GTP binding; guanyl-nucleotide exchange factor activity; GTPase binding. It is involved in the biological processes: multicellular organismal development; endocytosis; intracellular protein transport; intracellular signaling cascade; mesoderm development; muscle development; phagocytosis; signal transduction | dedicator of cytokinesis 3, 1, 2, 4, 5                    | 0         |
| FBgn0051639                                                                     | CG31639                       | molecular function is unknown. The biological processes in which it is involved are not known                                                                                                                                                                                                                                                                                              | No significant similarity found                           |           |
| CG18166:<br>FBgn0029526,<br>CG32817:<br>FBgn0052817,<br>CG3176:<br>FBgn0029524  | CG3176<br>CG18166<br>CG32817  | molecular function is unknown. The biological processes in which it is involved are not known                                                                                                                                                                                                                                                                                              | No significant similarity found                           |           |
| FBgn0051860                                                                     | CG31860                       | molecular function is described as zinc ion transmembrane transporter activity. It is involved in the biological process zinc ion transport.                                                                                                                                                                                                                                               | solute carrier family 30, member 2 isoform 1              | 2.00E-83  |
| FBgn0044328                                                                     | CG32052                       | molecular function is described as sphingomyelin phosphodiesterase activity. The biological processes in which it is involved are not known                                                                                                                                                                                                                                                | acid sphingomyelinase-like phosphodiesterase 3B isoform 1 | 2.00E-64  |
| FBgn0052182                                                                     | CG32182                       | molecular function is unknown. The biological processes in which it is involved are not known                                                                                                                                                                                                                                                                                              | No significant similarity found                           |           |
| CG33255:<br>FBgn0053255,<br>CR32205:<br>FBgn0052205,<br>CG32207:<br>FBgn0052207 | CG32207<br>CR32205<br>CG33255 | molecular function is unknown. The biological processes in which it is involved are not known.                                                                                                                                                                                                                                                                                             | No significant similarity found                           |           |
| FBgn0052642                                                                     | CG32642                       | molecular function is unknown. The biological processes in which it is involved are not known                                                                                                                                                                                                                                                                                              | proteoglycan 4                                            | 1.00E-15  |

Supplementary Table 3. Dipteran DVHFs and their human homologues

|             |         |                                                                                                                                                                                                                                                                                                                                                               |                                                                                                                   |           |
|-------------|---------|---------------------------------------------------------------------------------------------------------------------------------------------------------------------------------------------------------------------------------------------------------------------------------------------------------------------------------------------------------------|-------------------------------------------------------------------------------------------------------------------|-----------|
| FBgn0037967 | CG3281  | molecular function is described as: transcription regulator ZNF91 activity; DNA binding; zinc ion binding. It is involved in the biological processes: nucleobase, nucleoside, nucleotide and nucleic acid metabolic process; regulation of transcription from RNA polymerase II promoter; transcription from RNA polymerase II promoter; nucleosome assembly | zinc finger protein 91 (NJB note lots of orthologs)                                                               | 5.00E-41  |
| FBgn0053129 | CG33129 | molecular function is unknown. The biological processes in which it is involved are not known                                                                                                                                                                                                                                                                 | Hypothetical protein FLJ20254                                                                                     | 4.00E-33  |
| FBgn0053263 | CG33263 | molecular function is described as chitin binding. It is involved in the biological process chitin metabolic process                                                                                                                                                                                                                                          | PHD finger protein 2                                                                                              | 7.00E-04  |
| FBgn0053300 | CG33300 | <u>molecular function is unknown. The biological processes in which it is involved are not known. One allele is reported. No phenotypic data is available</u>                                                                                                                                                                                                 | mucin 2 precursor                                                                                                 | 2.00E-175 |
| FBgn0085277 | CG34248 |                                                                                                                                                                                                                                                                                                                                                               |                                                                                                                   |           |
| FBgn0034982 | CG4065  | molecular function is unknown. The biological processes in which it is involved are not known                                                                                                                                                                                                                                                                 | corneal wound healing-related protein                                                                             | 2.00E-143 |
| FBgn0031307 | CG4726  | molecular function is described as high affinity inorganic phosphate:sodium symporter activity. It is involved in the biological process transport.                                                                                                                                                                                                           |                                                                                                                   |           |
| FBgn0032205 | CG4957  | molecular function is described as: integrase activity; DNA binding; zinc ion binding. It is involved in the biological process DNA integration                                                                                                                                                                                                               |                                                                                                                   |           |
| FBgn0038344 | CG5205  | molecular function is described as: helicase activity; RNA ASCC3 helicase activity; ATP-dependent helicase activity; ATP binding; nucleic acid binding. It is involved in the biological process nuclear mRNA splicing, via spliceosome                                                                                                                       | activating signal cointegrator 1 complex subunit 3 isoform a, and PREDICTED: similar to U5 snRNP-specific protein | 0         |
| FBgn0038909 | CG6569  | molecular function is unknown. The biological processes in which it is involved are not known                                                                                                                                                                                                                                                                 | smooth muscle myosin heavy chain 11 isoform SM1B (njb note lots of orthologes)                                    | 9.00E-14  |
| FBgn0037901 | CG6744  | molecular function is described by 3'-5' exonuclease activity; EXDL2 nucleic acid binding. It is involved in the biological process nucleobase, nucleoside, nucleotide and nucleic acid metabolic process                                                                                                                                                     | exonuclease 3'-5' domain-like 2                                                                                   | 4.00E-94  |
| FBgn0035099 | CG6845  | molecular function is unknown. The biological processes in which it is involved are not known                                                                                                                                                                                                                                                                 | DC-STAMP domain containing 2                                                                                      | 1.00E-43  |
| FBgn0030884 | CG6847  | molecular function is described as triacylglycerol lipase activity. PNLIPRP1 It is involved in the biological process lipid metabolic process                                                                                                                                                                                                                 | pancreatic lipase-related protein 1                                                                               | 1.00E-55  |
| FBgn0036528 | CG7579  | molecular function is described as polypeptide N-acetylgalactosaminyltransferase activity. It is involved in the biological processes: polysaccharide metabolic process; protein amino acid glycosylation; oligosaccharide biosynthetic process                                                                                                               | GalNAc transferase 10 isoform a                                                                                   | 5.00E-66  |
| FBgn0038652 | CG7720  | molecular function is described as: sodium:iodide symporter SLC5A12 activity; cation transmembrane transporter activity. It is involved in the biological processes: cation transport; coenzyme metabolic process; extracellular transport; prosthetic group metabolic process; transport                                                                     | solute carrier family 5 (sodium/glucose cotransporter), member 12                                                 | 2.00E-79  |
| FBgn0028847 | CG9014  | molecular function is described as: protein binding; zinc ion binding; hydrolase activity, hydrolyzing O-glycosyl compounds. It is involved in the biological process carbohydrate metabolic process                                                                                                                                                          |                                                                                                                   |           |
| FBgn0034558 | CG9236  | molecular function is described as: calcium-dependent protein serine/threonine phosphatase regulator activity; calcium ion binding. The biological processes in which it is involved are not known                                                                                                                                                            |                                                                                                                   |           |
| FBgn0037623 | CG9801  | molecular function is described as catalytic activity. The biological processes in which it is involved are not known                                                                                                                                                                                                                                         | No significant similarity found                                                                                   |           |
| FBgn0034808 | CG9896  | molecular function is unknown. The biological processes in which it is involved are not known                                                                                                                                                                                                                                                                 | No significant similarity found.                                                                                  |           |

### Supplementary Table 3. Dipteran DVHFs and their human homologues

|             |         |                                                                                                                                                                                                                                                                                                                                                                                                                               |                                                                                        |           |
|-------------|---------|-------------------------------------------------------------------------------------------------------------------------------------------------------------------------------------------------------------------------------------------------------------------------------------------------------------------------------------------------------------------------------------------------------------------------------|----------------------------------------------------------------------------------------|-----------|
| FBgn0022701 | Cht3    | molecular function is described as: chitinase activity; hydrolase CHIA activity, hydrolyzing N-glycosyl compounds; cation binding; chitin binding. It is involved in the biological processes: cuticle chitin catabolic process; cell-cell signaling; signal transduction                                                                                                                                                     | chitinase, acidic isoform c & chitotriosidase                                          | 2.00E-78  |
| FBgn0243513 | cnir    | molecular function is unknown. It is involved in the biological processes: vesicle-mediated transport; intracellular signaling cascade.                                                                                                                                                                                                                                                                                       |                                                                                        |           |
| FBgn0037223 | CR14638 | molecular function is unknown. The biological processes in which it is involved are not known                                                                                                                                                                                                                                                                                                                                 |                                                                                        |           |
| FBgn0053319 | CR33319 | molecular function is unknown. The biological processes in which it is involved are not known                                                                                                                                                                                                                                                                                                                                 | RNA only, no protein seq predicted.                                                    |           |
| FBgn0033979 | Cyp6a19 | molecular function is described as: electron carrier activity; CYP3A5 oxidoreductase activity; heme binding; iron ion binding; monooxygenase activity. It is involved in the biological processes: steroid metabolic process; electron transport.                                                                                                                                                                             | cytochrome P450, family 3, subfamily A, polypeptide 5 (NJB note: several polypeptides) | 8.00E-57  |
| FBgn0013810 | Dhc36C  | molecular function is described as: ATPase activity, coupled; DNAH7 motor activity; microtubule motor activity; structural constituent of cytoskeleton; ATP binding; ATPase activity; glycerol-3-phosphate dehydrogenase activity. It is involved in the biological processes: microtubule-based movement; cell motility; glycerol-3-phosphate metabolic process                                                              | dynein, axonemal, heavy chain 7, 3, 10, 17, 11, 9, 5, 8                                | 0         |
| FBgn0015657 | DnaJ-1  | molecular function is described as: unfolded protein binding; heat shock protein binding. It is involved in the biological processes: response to heat; defense response; protein folding; response to stress                                                                                                                                                                                                                 | DnaJ (Hsp40) homolog, subfamily B, member 4                                            | 1.00E-101 |
| FBgn0004898 | fd96Cb  | molecular function is described as: transcription factor activity; sequence-specific DNA binding. It is involved in the biological processes: embryonic development; regulation of transcription from RNA polymerase II promoter; regulation of transcription, DNA-dependent                                                                                                                                                  | forkhead box B1                                                                        | 8.00E-48  |
| FBgn0035870 | Gr66a   | molecular function is described as taste receptor activity. It is involved in the biological processes: sensory perception of taste; response to caffeine                                                                                                                                                                                                                                                                     | No significant similarity found                                                        |           |
| FBgn0016660 | H15     | molecular function is described as transcription factor activity. It is involved in the biological processes: heart development; cardioblast cell fate commitment; embryonic heart tube development; mesoderm development; regulation of transcription from RNA polymerase II promoter; regulation of transcription, DNA-dependent                                                                                            | T-box transcription factor TBX20 isoform A, B                                          | 1.00E-83  |
| FBgn0039019 | HP1c    | molecular function is described as chromatin binding. It is involved in the biological processes: chromatin assembly or disassembly; regulation of transcription from RNA polymerase II promoter                                                                                                                                                                                                                              | chromobox homolog 1 (HP1 beta homolog Drosophila ) (Njb note: CBX1,3,5)                | 2.00E-29  |
| FBgn0033156 | Incenp  | molecular function is described as: microtubule binding; protein binding. It is involved in the biological processes: histone phosphorylation; metaphase plate congression; protein localization; mitotic spindle organization and biogenesis                                                                                                                                                                                 | inner centromere protein antigens 135/155kDa isoform 1, and mucin 17                   | 2.00E-20  |
| FBgn0025776 | ind     | molecular function is described as: transcription factor activity; sequence-specific DNA binding. It is involved in the biological processes: regulation of transcription; ventral cord development; dorsal/ventral pattern formation; neuroblast fate determination; brain development; ectoderm development; central nervous system development; pattern specification process; regulation of transcription, DNA-dependent. | GS homeobox 1                                                                          | 1.00E-22  |

Supplementary Table 3. Dipteran DVHFs and their human homologues

|                                                                      |             |                                                                                                                                                                                                                                                                                                                                                                                                                                                                                                                                                                                                                                                                                                                                                                     |                                                                |           |
|----------------------------------------------------------------------|-------------|---------------------------------------------------------------------------------------------------------------------------------------------------------------------------------------------------------------------------------------------------------------------------------------------------------------------------------------------------------------------------------------------------------------------------------------------------------------------------------------------------------------------------------------------------------------------------------------------------------------------------------------------------------------------------------------------------------------------------------------------------------------------|----------------------------------------------------------------|-----------|
| FBgn0052179                                                          | Krn         | molecular function is described as: epidermal growth factor NRG1 receptor binding; growth factor activity. It is involved in the biological processes: MAPKKK cascade; positive regulation of epidermal growth factor receptor activity; ommatidial rotation; epidermal growth factor receptor signaling pathway; border follicle cell migration.                                                                                                                                                                                                                                                                                                                                                                                                                   | neuregulin 1 isoform ndf43 (njb note: and other isoforms)      | 6.00E-08  |
| FBgn0028336                                                          | I(1)G0255   | molecular function is described as fumarate hydratase activity. It is involved in the biological processes: tricarboxylic acid cycle; fumarate metabolic process                                                                                                                                                                                                                                                                                                                                                                                                                                                                                                                                                                                                    | fumarate hydratase precursor                                   | 0         |
| FBgn0034083                                                          | lbk         | molecular function is described as protein binding. It is involved in the biological processes: bristle morphogenesis; cell adhesion; transmission of nerve impulse; oogenesis. 4 alleles are reported                                                                                                                                                                                                                                                                                                                                                                                                                                                                                                                                                              | leucine-rich repeats and immunoglobulin-like domains 3         | 5.00E-128 |
| FBgn0005630                                                          | lola        | molecular function is described as: specific RNA polymerase II transcription factor activity; transcription activator activity; protein binding; RNA polymerase II transcription factor activity; zinc ion binding; nucleic acid binding; motor activity; structural molecule activity. It is involved in the biological processes: axon guidance; axonogenesis; positive regulation of transcription, DNA-dependent; axon midline choice point recognition; antimicrobial humoral response; regulation of transcription from RNA polymerase II promoter; chromatin assembly or disassembly; sex determination; transmission of nerve impulse; ciliary or flagellar motility                                                                                        | kelch-like 3                                                   | 2.00E-10  |
| FBgn0028582                                                          | lqf         | molecular function is unknown. It is involved in the biological processes: neurotransmitter secretion; synaptic vesicle endocytosis; endocytosis; negative regulation of cardioblast cell fate specification; regulation of Notch signaling pathway                                                                                                                                                                                                                                                                                                                                                                                                                                                                                                                 |                                                                |           |
| LysD:<br>FBgn0004427L<br>ysC:<br>FBgn0004426L<br>ysB:<br>FBgn0004425 | LysB   LysC | molecular function is described as lysozyme activity. It is involved in the biological processes: antimicrobial humoral response; cell wall catabolic process                                                                                                                                                                                                                                                                                                                                                                                                                                                                                                                                                                                                       | lysozyme precursor                                             | 2.00E-22  |
| FBgn0002576                                                          | lz          | molecular function is described as: RNA polymerase II transcription factor activity; RNA polymerase II transcription factor activity, enhancer binding; transcription factor activity; DNA binding; sequence-specific DNA binding; electron transporter, transferring electrons within the cyclic electron transport pathway of photosynthesis activity; ATP binding. It is involved in the biological processes described with 26 unique terms, many of which group under: anatomical structure development; sensory organ development; hemocyte differentiation; organ development; wound healing; organ morphogenesis; regulation of metabolic process; response to stress; lymph gland hemocyte differentiation; transcription from RNA polymerase II promoter. | runt-related transcription factor 1 isoform b                  | 1.00E-51  |
| FBgn0083077                                                          | mld         | molecular function is described as: zinc ion binding; nucleic acid binding. It is involved in the biological process ecdysone biosynthetic process                                                                                                                                                                                                                                                                                                                                                                                                                                                                                                                                                                                                                  | zinc finger protein 236                                        | 3.00E-18  |
| FBgn0043025                                                          | Msi         | molecular function is described as: growth factor activity; deaminase activity. It is involved in the biological processes: spermatid development; purine ribonucleoside monophosphate biosynthetic process.                                                                                                                                                                                                                                                                                                                                                                                                                                                                                                                                                        | cat eye syndrome critical region protein 1 isoform a precursor | 1.00E-62  |

Supplementary Table 3. Dipteran DVHFs and their human homologues

|             |                |                                                                                                                                                                                                                                                                                                                                                                                                                                                                                                              |           |                                                              |           |
|-------------|----------------|--------------------------------------------------------------------------------------------------------------------------------------------------------------------------------------------------------------------------------------------------------------------------------------------------------------------------------------------------------------------------------------------------------------------------------------------------------------------------------------------------------------|-----------|--------------------------------------------------------------|-----------|
| FBgn0000036 | nAcRalpha-96Aa | molecular function is described as: nicotinic acetylcholine-activated cation-selective channel activity; acetylcholine receptor activity; neurotransmitter receptor activity. It is involved in the biological processes: cation transport; muscle contraction; nerve-nerve synaptic transmission; neuromuscular synaptic transmission; ion transport                                                                                                                                                        | CHRNA2    | cholinergic receptor, nicotinic, alpha polypeptide 2         | 2.00E-126 |
| FBgn0031145 | Ntf-2          | molecular function is described as protein transmembrane transporter activity. It is involved in the biological process protein import into nucleus                                                                                                                                                                                                                                                                                                                                                          |           |                                                              |           |
| FBgn0038722 | Nup58          | molecular function is described as nucleocytoplasmic transporter activity. It is involved in the biological process nucleocytoplasmic transport                                                                                                                                                                                                                                                                                                                                                              | NUPL1     | nucleoporin like 1 isoform a, b, c                           | 5.00E-49  |
| FBgn0034475 | Obp56h         | molecular function is described as odorant binding. It is involved in the biological processes: sensory perception of chemical stimulus; sensory perception of smell; olfactory behavior; response to pheromone; transport                                                                                                                                                                                                                                                                                   |           | No significant similarity found                              |           |
| FBgn0014184 | Oda            | molecular function is described as ornithine decarboxylase inhibitor activity. It is involved in the biological process cell differentiation                                                                                                                                                                                                                                                                                                                                                                 |           |                                                              |           |
| FBgn0021967 | Pdsw           | molecular function is described by NADH dehydrogenase (ubiquinone) activity; NADH dehydrogenase activity. It is involved in the biological process mitochondrial electron transport, NADH to ubiquinone                                                                                                                                                                                                                                                                                                      | NDUFB10   | NADH dehydrogenase (ubiquinone) 1 beta subcomplex, 10, 22kDa | 3.00E-21  |
| FBgn0016054 | phr6-4         | molecular function is described as: DNA (6-4) photolyase activity; nucleic acid binding. It is involved in the biological process DNA repair                                                                                                                                                                                                                                                                                                                                                                 | CRY2      | cryptochrome 2 (photolyase-like)                             | 5.00E-155 |
| FBgn0013725 | phyl           | molecular function is described as: protein binding; zinc ion binding. It is involved in the biological processes: R1/R6 cell fate commitment; R7 cell fate commitment; Ras protein signal transduction; peripheral nervous system development; R7 cell development; sensory organ boundary specification; sensory organ precursor cell fate determination                                                                                                                                                   | C5orf5    | hypothetical protein LOC51306 isoform 3                      | 0.01      |
| FBgn0003162 | Pu             | molecular function is described as: GTP cyclohydrolase activity; GTP cyclohydrolase activity. It is involved in the biological processes: ommochrome biosynthetic process; tetrahydrobiopterin biosynthetic process; purine base metabolic process; aromatic compound biosynthetic process                                                                                                                                                                                                                   | GCH1      | GTP cyclohydrolase 1 isoform 1                               | 9.00E-79  |
| FBgn0053207 | pxb            | molecular function is unknown. It is involved in the biological processes: smoothed signaling pathway; learning and/or memory; olfactory learning                                                                                                                                                                                                                                                                                                                                                            | LOC731133 | PREDICTED: hypothetical protein                              | 2.00E-04  |
| FBgn0003263 | m              | molecular function is described as: transcription factor activity; zinc ion binding. It is involved in the biological processes: imaginal disc-derived leg morphogenesis; regulation of transcription; cell proliferation; regulation of transcription from RNA polymerase II promoter; compound eye development                                                                                                                                                                                             | ZNF384    | nuclear matrix transcription factor 4 isoform b              | 3.00E-69  |
| FBgn0010638 | Sec61beta      | molecular function is described as protein transporter activity. It is involved in the biological process SRP-dependent cotranslational protein targeting to membrane, translocation                                                                                                                                                                                                                                                                                                                         | SEC61B    | Sec61 beta subunit                                           | 1.00E-30  |
| FBgn0001965 | Sos            | molecular function is described as: protein binding; Ras guanyl-nucleotide exchange factor activity; DNA binding; Rho guanyl-nucleotide exchange factor activity. It is involved in the biological processes: Ras protein signal transduction; sevenless signaling pathway; actin filament organization; regulation of cell shape; determination of anterior/posterior axis, embryo; torso signaling pathway; nervous system development; nucleosome assembly; regulation of Rho protein signal transduction |           |                                                              |           |

Supplementary Table 3. Dipteran DVHFs and their human homologues

|             |              |                                                                                                                                                                                                                                                                                                                                                                                                                                                |                                                                                                             |           |
|-------------|--------------|------------------------------------------------------------------------------------------------------------------------------------------------------------------------------------------------------------------------------------------------------------------------------------------------------------------------------------------------------------------------------------------------------------------------------------------------|-------------------------------------------------------------------------------------------------------------|-----------|
| FBgn0014037 | Su(Tpl)      | molecular function is described as: transcription elongation ELL2 regulator activity; RNA polymerase II transcription elongation factor activity. The biological processes in which it is involved are not known                                                                                                                                                                                                                               | elongation factor, RNA polymerase II, 2                                                                     | 1.00E-30  |
| FBgn0033876 | synaptogyrin | molecular function is unknown. It is involved in the biological processes: regulation of calcium ion-dependent exocytosis; synaptic vesicle exocytosis                                                                                                                                                                                                                                                                                         | synaptogyrin 1 isoform 1a , 1b, 2                                                                           | 2.00E-43  |
| FBgn0036341 | Syx13        | molecular function is described as SNAP receptor activity. It is involved in the biological processes: synaptic vesicle docking during exocytosis; neurotransmitter secretion; vesicle-mediated transport; cytokinesis after meiosis I; cytokinesis after mitosis; female meiosis; male meiosis; mitosis; protein targeting; intracellular protein transport                                                                                   | syntaxin 12                                                                                                 | 2.00E-28  |
| FBgn0024980 | Syx4         | molecular function is described as SNAP receptor activity. It is involved in the biological processes: neurotransmitter secretion; vesicle-mediated transport; synaptic vesicle docking during exocytosis; protein targeting; regulation of exocytosis                                                                                                                                                                                         | syntaxin 4                                                                                                  | 1.00E-26  |
| FBgn0010280 | Taf4         | molecular function is described as: general RNA polymerase II TAF4B transcription factor activity; transcription initiation factor activity; transcription factor activity. It is involved in the biological processes: regulation of transcription, DNA-dependent; transcription initiation from RNA polymerase II promoter; positive regulation of transcription from RNA polymerase II promoter; muscle development; dendrite morphogenesis | TAF4b RNA polymerase II, TATA box binding protein associated factor (NJB note: and mucin 2 precursor)       | 4.00E-72  |
| FBgn0026619 | tafazzin     | molecular function is described as TAZ phosphatidylcholine:cardiolipin O-linoleoyltransferase. It is involved in the biological processes: phospholipid metabolic process; cardiolipin biosynthetic process                                                                                                                                                                                                                                    | tafazzin isoform 2                                                                                          | 1.00E-64  |
| FBgn0050445 | Tdc1         | molecular function is described as: tyrosine decarboxylase DDC activity; aromatic-L-amino-acid decarboxylase activity; pyridoxal phosphate binding. It is involved in the biological processes: amino acid metabolic process; transmission of nerve impulse; amino acid and derivative metabolic process; carboxylic acid metabolic process                                                                                                    | dopa decarboxylase (aromatic L-amino acid decarboxylase)                                                    | 2.00E-136 |
| FBgn0051143 | tRNA:CR31143 | molecular function is unknown. The biological processes in which it is involved are not known                                                                                                                                                                                                                                                                                                                                                  |                                                                                                             |           |
| FBgn0035895 | Unr          | molecular function is described as: nucleic acid binding; mRNA binding; protein binding; mRNA 3'-UTR binding; DNA binding. It is involved in the biological processes: negative regulation of translation; dosage compensation, by hyperactivation of X chromosome; regulation of transcription, DNA-dependent                                                                                                                                 | upstream of NRAS isoform 1                                                                                  | 7.00E-114 |
| FBgn0030262 | Vago         | molecular function is unknown. The biological processes in which it is involved are not known                                                                                                                                                                                                                                                                                                                                                  | No significant similarity found.                                                                            |           |
| FBgn0040069 | vanin-like   | molecular function is described as pantetheinase activity. It is involved in the biological processes: cell motility; cell-cell adhesion; coenzyme metabolic process; cytoskeleton organization and biogenesis; prosthetic group metabolic process; signal transduction; vitamin biosynthetic process; nitrogen compound metabolic process                                                                                                     | biotinidase precursor (NJB note: also Vanin 1 - 3)                                                          | 5.00E-40  |
| FBgn0010426 | Vha14        | molecular function is described as: hydrogen-exporting ATPase activity, phosphorylative mechanism; hydrogen ion transporting ATPase activity, rotational mechanism; hydrogen ion transporting ATP synthase activity, rotational mechanism. It is involved in the biological processes: proton transport; ATP synthesis coupled proton transport                                                                                                | ATPase, H <sup>+</sup> transporting, lysosomal 14kD, V1 subunit F (NJB Note: receptor-mediated endocytosis) | 7.00E-47  |

### Supplementary Table 3. Dipteran DVHFs and their human homologues

|             |           |                                                                                                                                                                                                                                                                                                                                                                                                           |                                                                     |           |
|-------------|-----------|-----------------------------------------------------------------------------------------------------------------------------------------------------------------------------------------------------------------------------------------------------------------------------------------------------------------------------------------------------------------------------------------------------------|---------------------------------------------------------------------|-----------|
| FBgn0028665 | VhaAC39   | molecular function is described as: hydrogen-exporting ATPase activity, phosphorylative mechanism; hydrogen ion transporting ATPase activity, rotational mechanism; hydrogen ion transporting ATP synthase activity, rotational mechanism. It is involved in the biological processes: proton transport; ATP synthesis coupled proton transport                                                           | ATPase, H+ transporting, lysosomal, V0 subunit d1                   | 1.00E-170 |
| FBgn0028662 | VhaPPA1-1 | molecular function is described as: hydrogen-exporting ATPase activity, phosphorylative mechanism; hydrogen ion transporting ATPase activity, rotational mechanism; ATP binding; hydrogen ion transporting ATP synthase activity, rotational mechanism. It is involved in the biological processes: cation transport; mitotic spindle organization and biogenesis; ATP synthesis coupled proton transport | ATPase, H+ transporting, lysosomal 21kDa, V0 subunit b isoform 1, 2 | 2.00E-63  |

Supplementary Table 4. Effect of RNAi-mediated knockdown of human DVHFs on infection by Yellow Fever-17D and Coxsackie-B3 viruses.

| Virus                   | DEN2-NGC <sup>i</sup>                                       | YFV-17D <sup>ii</sup>                  | CB3 <sup>iii</sup>                     |
|-------------------------|-------------------------------------------------------------|----------------------------------------|----------------------------------------|
| Gene product            |                                                             |                                        |                                        |
| CNOT2                   | <i>CNOT2_4</i><br><i>CNOT2_8</i>                            | <i>CNOT2_4</i>                         | <i>CNOT2_4</i><br><i>CNOT2_8</i>       |
| NPR2 <sup>iv</sup>      | <i>NPR2_2</i><br><i>NPR2_5</i>                              | <i>NPR2_5</i>                          | <i>NPR2_5</i>                          |
| SEC61B <sup>v</sup>     | <i>SEC61B_5</i><br><i>SEC61B_6</i>                          | <i>SEC61B_5</i>                        | <i>SEC61B_5</i>                        |
| EXDL2                   | <i>EXDL2_1</i><br><i>EXDL2_5</i> <sup>vi</sup>              |                                        |                                        |
| FLJ20254 <sup>vii</sup> | <i>FLJ20254_1</i><br><i>FLJ20254_2</i><br><i>FLJ20254_3</i> | <i>FLJ20254_2</i><br><i>FLJ20254_3</i> | <i>FLJ20254_1</i><br><i>FLJ20254_2</i> |
| TAZ <sup>viii</sup>     | <i>TAZ_2</i><br><i>TAZ_5</i>                                | <i>TAZ_5</i>                           | <i>TAZ_2</i><br><i>TAZ_5</i>           |

<sup>i</sup> siRNAs listed (in italics) inhibited viral gene expression  $\geq 2$  fold. Shaded boxes indicate when two or more siRNAs against a gene product resulted in  $\geq 2$  fold inhibition. DEN2-NGC gene expression was measured by quantifying percentage of cells positive for E protein expression.

<sup>ii</sup> 17D gene expression was measured using the same monoclonal ab to E protein (pan-flavi recognition).

<sup>iii</sup> CB3 gene products were recognized by anti-enterovirus mouse monoclonal 5-D8/1 (DAKO).

<sup>iv</sup> A third siRNA inhibited CB3 but not DEN2-NGC or YFV-17D

<sup>v</sup> Inhibition of DEN2-NGC was weak

<sup>vi</sup> Also named C14orf114\_2

<sup>vii</sup> A fourth siRNA inhibited CB3 but not DEN2-NGC or YFV-17D

<sup>viii</sup> TAZ knockdown led to diminished cell counts.
